1 **Differences in expression of tumor suppressor, innate immune, inflammasome, and**  
2 **potassium/gap junction channel host genes significantly predict viral reservoir size**  
3 **during treated HIV infection**  
4

5 **Ashok K. Dwivedi<sup>1</sup>, David A. Siegel<sup>1</sup>, Cassandra Thanh<sup>2</sup>, Rebecca Hoh<sup>1</sup>, Kristen S. Hobbs<sup>2</sup>,**  
6 **Tony Pan<sup>2</sup>, Erica A. Gibson<sup>2</sup>, Jeffrey Martin<sup>3</sup>, Frederick Hecht<sup>1</sup>, Christopher Pilcher<sup>1</sup>, Jeffrey**  
7 **Milush<sup>2</sup>, Michael P. Busch<sup>4</sup>, Mars Stone<sup>4</sup>, Meei-Li Huang<sup>5,6</sup>, Claire N. Levy<sup>6,7</sup>, Pavitra**  
8 **Roychoudhury<sup>5,6</sup>, Florian Hladik<sup>6,7</sup>, Keith R. Jerome<sup>5,6</sup>, Timothy J. Henrich<sup>2</sup>, Steven G.**  
9 **Deeks<sup>1\*</sup> and Sulggi A. Lee<sup>1\*\*</sup>**

10  
11 <sup>1</sup> Department of Medicine, Division of HIV, Infectious Diseases & Global Medicine, University of  
12 California San Francisco, 995 Potrero Avenue, San Francisco, CA 94110, USA. <sup>2</sup> Department of  
13 Medicine, Division of Experimental Medicine, University of California San Francisco, CA 94110,  
14 USA. <sup>3</sup> Department of Biostatistics & Epidemiology, University of California San Francisco, CA  
15 94158, USA. <sup>4</sup> Vitalant Blood Bank, San Francisco, CA 94118 USA. <sup>5</sup> Department of Laboratory  
16 Medicine and Pathology, University of Washington, Seattle WA 98195, USA. <sup>6</sup> Vaccine and  
17 Infectious Disease Division, Fred Hutchinson Cancer Center, Seattle WA 98109, USA. <sup>7</sup>  
18 Department of Obstetrics and Gynecology, University of Washington, WA, 98105 USA.

19  
20 \*Co-correspondence:

21 [sulggi.lee@ucsf.edu](mailto:sulggi.lee@ucsf.edu), [steven.deeks@ucsf.edu](mailto:steven.deeks@ucsf.edu)

22 #Lead contact

23  
24 Title Character Count (max 200): 193

25 Manuscript Word Count (max 9000): 5414

26 **Abstract**

27 The major barrier to an HIV cure is the persistence of infected cells that evade host immune  
28 surveillance despite effective antiretroviral therapy (ART). Most prior host genetic HIV studies  
29 have focused on identifying DNA polymorphisms (e.g., *CCR5*Δ32, MHC class I alleles) associated  
30 with viral load among untreated “elite controllers” (~1% of HIV+ individuals who are able to control  
31 virus without ART). However, there have been few studies evaluating host genetic predictors of  
32 viral control for the majority of people living with HIV (PLWH) on ART. We performed host RNA  
33 sequencing and HIV reservoir quantification (total DNA, unspliced RNA, intact DNA) from  
34 peripheral CD4+ T cells from 191 HIV+ ART-suppressed non-controllers. Multivariate models  
35 included covariates for timing of ART initiation, nadir CD4+ count, age, sex, and ancestry. Lower  
36 HIV total DNA (an estimate of the total reservoir) was associated with upregulation of tumor  
37 suppressor genes *NBL1* (q=0.012) and *P3H3* (q=0.012). Higher HIV unspliced RNA (an estimate  
38 of residual HIV transcription) was associated with downregulation of several host genes involving  
39 inflammasome (*IL1A*, *CSF3*, *TNFAIP5*, *TNFAIP6*, *TNFAIP9*, *CXCL3*, *CXCL10*) and innate  
40 immune (*TLR7*) signaling, as well as novel associations with potassium (*KCNJ2*) and gap junction  
41 (*GJB2*) channels, all q<0.05. Gene set enrichment analyses identified significant associations with  
42 TLR4/microbial translocation (q=0.006), IL-1β/NRLP3 inflammasome (q=0.008), and IL-10  
43 (q=0.037) signaling. HIV intact DNA (an estimate of the “replication-competent” reservoir)  
44 demonstrated trends with thrombin degradation (*PLGLB1*) and glucose metabolism (*AGL*) genes,  
45 but data were (HIV intact DNA detected in only 42% of participants). Our findings demonstrate  
46 that among treated PLWH, that inflammation, innate immune responses, bacterial translocation,  
47 and tumor suppression/cell proliferation host signaling play a key role in the maintenance of the  
48 HIV reservoir during ART. Further data are needed to validate these findings, including functional  
49 genomic studies, and expanded epidemiologic studies in female, non-European cohorts.

50

51 Abstract Word Count (max 300): 299

52 **Short Title (max 70 characters: 43):** Host gene expression and HIV reservoir size

53 **Keywords:** HIV reservoir, host genetics, RNA sequencing, epidemiology

54 **Author Summary (max word count 150-200):** 154

55 Although lifelong HIV antiretroviral therapy (ART) suppresses virus, the major barrier to an HIV  
56 cure is the persistence of infected cells that evade host immune surveillance despite effective  
57 ART, “the HIV reservoir.” HIV eradication strategies have focused on eliminating residual virus to  
58 allow for HIV remission, but HIV cure trials to date have thus far failed to show a clinically  
59 meaningful reduction in the HIV reservoir. There is an urgent need for a better understanding of  
60 the host-viral dynamics during ART suppression to identify potential novel therapeutic targets for  
61 HIV cure. This is the first epidemiologic host gene expression study to demonstrate a significant  
62 link between HIV reservoir size and several well-known immunologic pathways (e.g., IL-1 $\beta$ , TLR7,  
63 TNF- $\alpha$  signaling pathways), as well as novel associations with potassium and gap junction  
64 channels (Kir2.1, connexin 26). Further data are needed to validate these findings, including  
65 functional genomic studies and expanded epidemiologic studies in female, non-European  
66 cohorts.

67

68 **CONFLICTS:** The authors do not have a commercial or other association that might pose a  
69 conflict of interest.

70

71 **FUNDING:** This work was supported in part by the National Institutes of Health: K23GM112526  
72 (SAL), the DARE Collaboratory (U19 AI096109; SGD), the Division of Intramural Research of the  
73 National Institutes (MC), UM1 AI126623 (KRJ), and NIH/NIAID R01A141003 (TJH). This work  
74 was also supported by the amfAR Research Consortium on HIV Eradication a.k.a. ARCHE  
75 (108072-50-RGRL; SGD) and a Collaboration for AIDS Vaccine Discovery (CAVD) grant from the  
76 Bill & Melinda Gates Foundation (INV-008500), the Reservoir Assay Validation and Evaluation

77 Network (RAVEN) Study Group. The funders had no role in the study design, data collection and  
78 analysis, decision to publish, or preparation of the manuscript.

79 **Reprints:** Reprint requests can be directed to Dr. Sulggi Lee, the corresponding author (contact  
80 information above).

81

## 82 **Acknowledgements:**

83 The authors wish to acknowledge the participation of all the study participants who contributed to  
84 this work as well as the clinical research staff of the SCOPE and Options who made this research  
85 possible. All funders had no role in study design, data collection and analysis, decision to publish,  
86 or preparation of the manuscript. All authors provided critical feedback in finalizing the report. SAL  
87 and DAS conceived and designed the study with critical feedback from SGD, TJH, and DAS.  
88 SGD, JM, FH, CP, RH, and SAL coordinated the collection, management, and quality control  
89 processes for the cohort clinical data and SGD, JM, FH, CP, MPB, MS provided biospecimens.  
90 SAL, CT, JM, KB, TP, EAG performed participant sample processing, SAL performed the RNA  
91 sequencing assays, and AKD performed quality control analyses and the association analyses  
92 for the study under the guidance of SAL and DAS. SAL, CT, and KH performed the qPCR HIV  
93 reservoir assays (total DNA, unspliced RNA) in the lab of TH. CNL and MLH performed the  
94 ddPCR HIV reservoir assay (intact DNA) in the labs of FH, KRJ, and HPK. AKD, PR, DAS, TJH,  
95 and SAL analyzed these HIV reservoir data in relation to host transcriptomic and clinical  
96 phenotype data. AKD, SAL, and DAS wrote the report. All authors provided critical feedback in  
97 finalizing the manuscript.

## 98 Introduction

99 Despite several unique cases of possible HIV remission [1-3], there is still no HIV vaccine  
100 or cure. The major barrier to a cure is the persistence of infected cells that evade host immune  
101 surveillance despite effective antiretroviral therapy (ART). Modern antiretroviral therapy (ART)  
102 has transformed HIV disease into a treatable chronic disease for individuals who have access to,  
103 and are able to maintain, viral suppression [4]. However, ART alone does not eliminate persistent  
104 virus in most individuals [5, 6]. HIV cure trials aimed at reactivating and eliminating the HIV  
105 reservoir have thus far failed to show a clinically meaningful reduction in the HIV reservoir [7-12].  
106 There is an urgent need to bridge drug discovery with a deeper understanding of host-viral  
107 dynamics. Although several host factors have been shown to influence the size of the “HIV  
108 reservoir”, such as the timing of ART initiation after initial HIV infection [13-16], maximum pre-  
109 ART viral load [17], ethnicity [17], and sex [17-20], there are few published human genomic and  
110 transcriptomic epidemiologic studies describing potential host factors influencing HIV persistence  
111 during treated infection.

112 Prior host genome wide association studies (GWAS) have focused on predictors of viral  
113 control (during untreated HIV disease), identifying key mutations in the C-C chemokine receptor  
114 type 5 gene (*CCR5 $\Delta$ 32*) and the human Major Histocompatibility Complex (MHC) human  
115 leukocyte antigen (HLA)-B and -C regions, that influence viral setpoint [21-24]. Recently our group  
116 reported these mutations (*CCR5 $\Delta$ 32* and *HLA -B\*57:01*) are associated with smaller HIV reservoir  
117 size [25]. However, mRNA expression of DNA variation is complex; the basal and/or the  
118 conditional expression of these genes in multicellular organisms are influenced by external  
119 controls (alternative splicing, polyadenylation, regulatory enhancers, etc.) which may differ by cell  
120 type and tissue [26-28]. The limited number of host gene expression studies during HIV infection  
121 (e.g., RNA sequencing) have compared gene expression between distinct clinical HIV groups.  
122 For example, one prior study compared gene expression among HIV “controllers” (individuals  
123 able to control virus in the absence of therapy) versus “non-controllers” [29]. Another study

124 compared HIV non-controllers initiating ART “early” (<6 months from HIV infection) versus “later”  
125 ( $\geq 6$  months after infection) [30]. However, no epidemiologic study has examined quantitative  
126 measures of the HIV reservoir size in relation to differences in host gene expression.

127 Here, we performed a cross-sectional study of 191 ART-suppressed HIV+ non-controllers  
128 to identify differentially expressed host genes in relation to three measures of the peripheral CD4+  
129 T cell reservoir: HIV cell-associated “intact” DNA (an estimate of the frequency of potentially  
130 “replication-competent” virus with intact HIV genomes) [31], as well as total DNA (approximates  
131 intact + defective HIV DNA) and unspliced (full length transcript prior to alternative splicing) RNA.  
132 Increased expression of two putative tumor suppressor genes, *NBL1* and *P3H3*, was associated  
133 with smaller total HIV reservoir size (tDNA). Higher HIV usRNA was associated with  
134 downregulation of 17 host genes, including genes involved in pathogen pattern recognition  
135 (*TLR7*), inflammasome cytokine activation (*IL1A*, *CSF3*, *TNFAIP65*, *TNFAIP6*, *TNFAIP9*), and  
136 chemokine production (*CXCL3*, *CXCL10*). Higher usRNA also demonstrated a novel association  
137 with *KCNJ2*, a gene encoding for an inwardly rectifying potassium (Kir2.1) channel which has  
138 been shown to enhance HIV entry and release into host cells [32], as well as with *GJB2*, which  
139 encodes for a gap junction channel which facilitates cell-cell signaling (e.g., K<sup>+</sup>, Ca<sup>+</sup>, ATP) that  
140 has been implicated in cell-cell HIV transfer [33, 34]. These data add to the limited literature on  
141 host genetic predictors of the HIV reservoir and suggest that checks on cell proliferation might  
142 limit the total HIV reservoir size while a more “active” reservoir may stimulate host innate immune  
143 responses and inflammation during treated HIV disease. Further data are needed to validate  
144 these findings, including functional genomic studies using CRISPR-cas9 editing and longitudinal  
145 samples allowing causal inferences, as well as expanded studies in female, non-European  
146 cohorts.

147

## 148 **Results**

### 149 **Study population**

150 HIV+ ART-suppressed non-controllers were sampled from the UCSF SCOPE and Options  
151 cohorts (**Supplemental Fig 1**). The final 191 study participants were mostly male (96%) with a  
152 median age of 47 years and included individuals treated during early (within 6 months) or more  
153 chronic (>6 months after) HIV infection (**Table 1**). At the time of biospecimen collection,  
154 participants were ART-suppressed for a median of 5.1 years with a median nadir CD4+ T cell  
155 count of 352 cells/mm<sup>3</sup> and maximum pre-ART HIV RNA of 5.1 log<sub>10</sub>copies/mL. As expected, our  
156 U.S.-based study population was diverse (**Fig 1**). Thus, all results are shown for the total study  
157 population (adjusted for ancestry using principal components [35]), as well as restricted to the  
158 largest homogenous ancestral subgroup (Europeans), in order to enhance the ability to detect  
159 statistically significant genetic associations.

160

#### 161 **Measures of the HIV reservoir size were correlated with each other**

162 Most of the HIV reservoir consists of cells harboring defective virus – i.e., cells that harbor  
163 HIV that is unable to go on to produce virions [36, 37], and yet the “replication-competent”  
164 reservoir is a major target of HIV eradication strategies [31, 38, 39]. Thus, there is currently no  
165 “gold standard” for measuring the HIV reservoir [40, 41]. Here, we performed three measures of  
166 the HIV reservoir from peripheral CD4+ T cells: total DNA (tDNA), unspliced RNA (usRNA), and  
167 HIV intact DNA. To estimate the frequency of the “replication-competent” reservoir, we performed  
168 a multiplexed droplet digital PCR (ddPCR) assay to quantify the frequency of cells with “intact”  
169 HIV sequences (i.e., likely to generate transcripts leading to virion production) [31, 40, 42]. HIV  
170 “total” (i.e., defective+intact) DNA and “unspliced” RNA (full-length HIV RNA) were also quantified  
171 using a separate, in-house quantitative polymerase chain reaction (qPCR) TaqMan assay [43].  
172 HIV usRNA was statistically significantly correlated with tDNA ( $R=0.58$ ,  $P=4.8 \times 10^{-19}$ ) and intact  
173 DNA ( $R=0.24$ ,  $P=1.9 \times 10^{-3}$ ). However, HIV intact DNA was undetectable in 48% of our measured  
174 samples while total DNA was measurable in 95% of samples, which may have influenced the lack  
175 of association between tDNA and intact DNA in our study population (**Fig 2**).

176

177 **Earlier ART initiation and nadir CD4+ T cell count were associated with HIV reservoir size**

178 Consistent with prior work [17, 37, 41], our study found that clinical factors previously  
179 shown to influence the size of the HIV reservoir were significantly associated with HIV reservoir  
180 measures quantified in our cohort. Earlier timing of ART initiation (<6 months from infection) was  
181 statistically significantly associated with lower levels of HIV intact DNA ( $R=0.21$ ;  $p=6.5 \times 10^{-3}$ ),  
182 tDNA ( $R=0.26$ ;  $p=3.3 \times 10^{-4}$ ), and usRNA ( $R=0.29$ ;  $p=7.0 \times 10^{-5}$ ) (**Fig 3**). Nadir CD4+ T cell count  
183 was associated with larger total HIV DNA reservoir size ( $R=-0.28$ ;  $P=6.9 \times 10^{-5}$ ), as well as higher  
184 levels of HIV usRNA ( $R=-0.28$ ;  $p=9.6 \times 10^{-5}$ ) and HIV intact DNA ( $R=-0.23$ ;  $p=0.002$ ). We did not  
185 observe a statistically significant association between HIV reservoir measures and other clinical  
186 factors: duration of ART suppression, age, or pre-ART HIV viral load, and we were unable to  
187 evaluate differences by sex/gender given low frequencies of female and transgender participants  
188 in our study.

189

190 **Increased expression of tumor suppressor genes was associated with total HIV DNA**  
191 **reservoir size while higher HIV usRNA was associated with downregulation of host**  
192 **inflammatory and innate immune genes**

193 A total of 19,912 genes out of 60,719 were included for downstream differential gene  
194 expression analyses. In multivariate models adjusted for age, sex, nadir CD4+ T cell count, timing  
195 of ART initiation, ancestry (PCs), and residual variability (probabilistic estimation of expression  
196 residuals, PEERs), larger total HIV DNA reservoir size was statistically significantly associated  
197 with downregulation of two host tumor suppressor genes while higher HIV usRNA levels were  
198 associated decreased expression of 17 host genes involved in inflammation and innate immunity.

199 We observed that upregulation of tumor suppressor genes, *NBL1* and *P3H3*, was  
200 associated with smaller total HIV DNA reservoir size (**Supplemental Table 1**). For each fold-  
201 increase in gene expression of *NBL1* or *P3H3*, there was a statistically significant decrease in



202 HIV total DNA (*NBL1*: -1.8%,  $q=0.012$ ; *P3H3*: -1.6%,  $q=0.012$ ). However, we observed the  
203 strongest associations between HIV reservoir size and host gene expression were with HIV  
204 unspliced RNA, largely reflecting the “transcriptionally active” HIV reservoir [44, 45]. A total of 17  
205 host genes were inversely associated with HIV usRNA, including *KCNJ2* (-9.7%,  $q=0.003$ ) which  
206 encodes for an inwardly rectifying potassium channel that has been shown to regulate HIV-1 entry  
207 and release [32], as well as *GJB2* (-7.1%,  $q=0.012$ ), which encodes for a gap junction protein that  
208 facilitate cell-cell communication, potentially also cell-cell HIV transfer [46, 47]. In addition to these  
209 novel associations, HIV usRNA was also associated with several host genes involved in  
210 proinflammatory cytokine signaling and inflammasome activation (*IL1A*: -9.6%,  $q=0.012$ , *CSF3*: -  
211 7.5%,  $q=0.013$ ; *TNFAIP6*: -7.6%,  $q=0.016$ , *TNFAIP9*: -6.9%,  $q=0.031$ , *TNFAIP5*: -5.9%,  $q=0.043$ ),  
212 innate immune responses (*TLR7*: -7.1%,  $q=0.016$ ), and chemokine production (*CXCL3*: -7.2%,  
213  $q=0.043$ ; *CXCL10*: -9.2%,  $q=0.049$ ) (**Table 2, Supplement Table 2**). Given the large number of  
214 gene hits for HIV usRNA, we also performed network analyses to better visualize immunologic  
215 pathways identified from the differential gene expression analysis ( $q<0.25$ ). We applied the  
216 ClueGo network analysis application, which clustered the large number of genes into biologically  
217 relevant, interpretable clusters [48]. These analyses highlighted several key pathways involving  
218 inflammasome activation [49-52] and bacterial translocation [53-55] – e.g., genes involved in  
219 NLRP3 (NOD-, LRR- and pyrin domain-containing protein 3) inflammasome activation, IL-1 $\beta$ , toll-  
220 like receptor 4, lipopolysaccharide (LPS), and IL-17 signaling (**Fig 4**). Using unbiased gene set  
221 enrichment analyses (GSEA), all genes in the transcriptome were rank-ordered by p-value to  
222 identify gene sets enriched for each HIV reservoir measurement. These analyses demonstrated  
223 that HIV total DNA was associated with complement activation and humoral immune response  
224 pathways, but these associations were only observed in the subgroup with the largest sample  
225 size, individuals of European ancestry (**Supplement Table 3**). HIV usRNA was again strongly  
226 associated with gene sets involving proinflammatory signaling and microbial translocation  
227 (“Response to Bacterium”,  $q=7.5\times 10^{-5}$ ; “Cellular Response to Lipopolysaccharide”,  $q=0.006$ ), IL-

228 1 signaling (“Interleukin-1 beta production”,  $q=0.008$ ; “Regulation of Interleukin-1 Production”,  
229  $q=0.008$ ), and cytokine production (“Tumor Necrosis Factor Production”,  $q=0.006$ ; “Tumor  
230 Necrosis Factor Superfamily Cytokine Production”,  $q=0.006$ ; “Regulation of Tumor Necrosis  
231 Factor Production”,  $q=0.008$ ). In addition, several gene sets related to IL-10 signaling (“regulation  
232 of interleukin-10 production”,  $q=0.037$ , “Interleukin-10 production”,  $q=0.041$ ) – an anti-  
233 inflammatory pathway associated HIV immune dysregulation and persistence [56-58] – were also  
234 significantly associated with HIV usRNA ( $q=0.04$ ) (**Fig 5, Supplement Table 4**).

235  
236 **HIV intact DNA was undetectable in over half of the samples but was significantly**  
237 **associated with gene sets involving neutrophil activation in the European subgroup**

238 HIV intact DNA was undetectable in over half of our measured samples while total DNA  
239 was measurable in 95% of samples (**Fig 2**). Hence, the statistical power to detect differential gene  
240 expression (DGE) associations was much lower for this assay compared to the other reservoir  
241 measures. By performing GSEA (a method that aggregates several genes into immunologically  
242 relevant “gene sets” to test for an association with HIV reservoir size), we were able to enhance  
243 the ability to detect potential associations with HIV intact DNA. In the differential gene expression  
244 analysis, among the European ancestry subgroup, we observed a positive trend ( $q<0.25$ )  
245 between HIV intact DNA and two genes, *PLGLB1* (+6.0%,  $q=0.23$ ), which encodes for a protein  
246 that inhibits thrombus degradation, and *AGL* (+0.9%,  $q=0.23$ ), encoding for an enzyme involved  
247 in glycogen degradation (**Supplemental Table 5**). GSEA demonstrated that gene sets involving  
248 neutrophil activation (“Neutrophil Degranulation”,  $q=0.046$ ; “Neutrophil Activation Involved in  
249 Immune Response”,  $q=0.046$ ; “Leukocyte Activation”;  $q=0.046$ ) were significantly associated with  
250 HIV intact DNA, while gene sets reflecting myeloid-mediated immunity (“Myeloid Leukocyte  
251 Mediated Immunity”;  $q=0.058$ ; “Myeloid Cell Activation Involved in Immune Response”;  $q=0.060$ )  
252 demonstrated a slight trend among European ancestry individuals (**Supplement Table 6**).

253

## 254 Discussion

255 In the largest population-based transcriptomic HIV reservoir study to date, among HIV+  
256 ART-suppressed non-controllers, we identified host genetic predictors (e.g., tumor suppressor  
257 genes) might act as “checks” on cell proliferation, potentially limiting the total HIV reservoir size.  
258 We also observed several associations with host genes indicating that a more “transcriptionally  
259 active” HIV reservoir [44, 45] may promote downregulation of potentially harmful host innate  
260 immune and proinflammatory responses. Given our cross-sectional study design, further  
261 functional and longitudinal epidemiologic studies are needed to determine potential causal  
262 relationships between host gene expression and HIV reservoir size. Nonetheless, these findings  
263 suggest that even during suppressive ART, ongoing host-pathogen dynamics maintain a delicate  
264 balance between a healthy host immune system and a persistent viral reservoir.

265 Differential gene expression analyses demonstrated that increased expression of tumor  
266 suppressor genes *NBL1* and *P3H3* was associated with a smaller total HIV DNA reservoir size.  
267 We observed statistically significant associations between two tumor suppressor genes, *NBL1*  
268 and *P3H3*, and HIV total DNA. Given the known function of these genes, these findings may  
269 suggest that increased expression of these host genes might impact the total HIV reservoir size,  
270 possibly by restricting cellular proliferation (**Supplemental Fig 2**). Alternatively, the association  
271 of these two tumor suppressor genes with total HIV reservoir size might suggest that cells  
272 harboring provirus integrated in genes promoting cell survival are selected for over time during  
273 ART suppression, as shown in HIV integration studies [59, 60]. *NBL1*, also known as  
274 neuroblastoma suppressor of tumorigenicity 1, is a transcription factor that belongs to the DAN  
275 (differential screening-selected gene aberrant in neuroblastoma) family of proteins [61, 62] and is  
276 involved in the negative regulation of cell cycle (G1/S transition) [63-66]. Interestingly, *NBL1* was  
277 differentially expressed in an RNA-seq *ex vivo* analysis of CD4+ T cells from rhesus macaques  
278 (after HIV-1 Env immunization and antibody co-administration) among groups that were treated  
279 with immune checkpoint modulators (CTLA-4, PD-1, and CTLA-4 + PD-1 Ab-treated), suggesting

280 that NBL1 may be a potential pathway by which the cell cycle might be disrupted to enhance HIV-  
281 1 Env antibody responses [67]. *P3H3* encodes for Prolyl 3-Hydroxylase 3, which functions as a  
282 collagen prolyl hydroxylase (vital for collagen biosynthesis) that affects properties of the  
283 extracellular matrix and alters cellular behavior [68-71]. Prior studies suggest that *P3H3* plays a  
284 role as a tumor suppressor in breast, lymphoid, and other cancers [72-74]. Additional genes  
285 identified from the gene set enrichment analysis suggest that ongoing humoral immunity [75] and  
286 complement activation [76] may further contribute to maintaining the total HIV reservoir size  
287 during ART suppression (**Supplemental Table 3**).

288 HIV unspliced RNA was strongly associated with differential expression of several host  
289 genes previously associated with HIV disease, including genes involving inflammasome  
290 activation and inflammatory cytokine signaling (*IL1A*, *CSF3*, *TNFAIP5*, *TNFAIP6*, *TNFAIP9*, *IL10*),  
291 chemokine signaling (*CXCL3*, *CXCL10*), and innate immune response pathogen pattern  
292 recognition (*TLR7*, *TLR4*) (**Table 2, Supplemental Table 2, Figure 5, Supplement Table 5**).  
293 Given the known function of these genes and pathways, these findings might reflect that a more  
294 “transcriptionally active” HIV reservoir leads to host downregulation of potentially harmful  
295 proinflammatory signaling pathways during chronic treated HIV disease (**Supplemental Fig 3a**).  
296 This would be consistent with prior data demonstrating that excessive inflammation and immune  
297 activation predicts increased morbidity and mortality in HIV+ individuals despite effective ART [44,  
298 45, 77-80].

299 Interleukin (IL)-1 is a potent proinflammatory cytokine that regulates inflammation,  
300 triggering a cascade of inflammatory mediators via the NOD-like receptor family pyrin domain  
301 containing 3 (NLRP3) inflammasome activation pathway [81, 82]. IL-1 is an “upstream” pro-  
302 inflammatory inducer of IL-6 [83], which is the strongest biomarker predicting serious non-AIDS  
303 morbidity (e.g., myocardial infarction, stroke, malignancy) [84-87] and mortality [80, 86-89] among  
304 HIV-infected ART-suppressed individuals. In our analysis, higher HIV usRNA was associated with  
305 decreased expression of *IL6* (-7.4%,  $q=0.062$ ), *IL1A* (-9.6%,  $q=0.012$ ), and *CSF3* (-7.5%,

306  $q=0.013$ ) (**Table 2, Supplemental Table 2**); the latter encodes for granulocyte colony stimulating  
307 factor 3, G-CSF, a member of the IL-6 superfamily of cytokines [90] that modulates cytokine  
308 production, differentiation, and induction of Treg cells [91]. Our pathway-based analyses  
309 demonstrated a strong association between HIV usRNA and several genes in the IL-1 $\beta$ /NLRP3  
310 inflammasome pathway (**Fig 4**), demonstrating for the first time, a link between this key  
311 immunologic pathway and the HIV reservoir.

312 Additional cytokines that were statistically significantly associated with HIV usRNA were  
313 several genes in the tumor necrosis (TNF)- $\alpha$  family: *TNFAIP5*, *TNFAIP6* and *TNFAIP9*. These  
314 genes encode for proteins regulating pro- and anti-inflammatory cellular signal transduction,  
315 differentiation, and apoptosis [92-95]. *TNFAIP5* encodes for a pattern recognition receptor that is  
316 induced in response to TNF- $\alpha$ , but also in response to toll-like receptor engagement and IL-1 $\beta$   
317 signaling [96, 97], signals that are modulated through the NF- $\kappa$ B pathway [98]. *TNFAIP6* encodes  
318 for another TNF- $\alpha$  protein which functions as an anti-inflammatory protein [99, 100], is induced by  
319 IL-1 (upon LPS-stimulation) [101, 102], and interacts with *TNFAIP5* [103, 104]. *TNFAIP9*, also  
320 known as *STEAP4* (six transmembrane epithelial antigen of prostate 4), has been shown to  
321 negatively regulate NF- $\kappa$ B, STAT-3 signaling, and IL-6 production [105, 106]. Several chemokines  
322 were also inversely associated with HIV usRNA, again suggesting that a more “transcriptionally  
323 active” HIV reservoir might promote downregulation of host proinflammatory responses during  
324 long-term ART suppression. *CXCL3* and *CXCL10*, which encode for critical chemokines involved  
325 in the recruitment of neutrophils [107] and activated Th1 lymphocytes [108] to sites of  
326 inflammation respectively, were associated with a 7.2% and 9.2% decrease in gene expression  
327 per two-fold increase in HIV usRNA. *CXCL3* regulates monocyte migration [109, 110], neutrophils  
328 chemoattraction [111-113], and angiogenesis [114], and is induced by proinflammatory IL-17  
329 [115, 116]. *CXCL10* encodes for IP-10 (interferon gamma-induced protein 10) which recruits  
330 activated Th1 lymphocytes to sites of infection [117-119] and in HIV, signals through TLR7/9-  
331 dependent pathways [119], predicts HIV disease progression [120, 121], correlates with acute

332 HIV seroconversion [122], and promotes HIV latency [123, 124]. Finally, in the gene set  
333 enrichment analysis, we also observed a statistically significant association between IL-10  
334 signaling and HIV usRNA (**Fig 5, Supplement Table 4**). IL-10 is an immunosuppressive cytokine  
335 that plays an essential role in limiting the host immune response to pathogens and regulating the  
336 magnitude and duration of inflammation to prevent damage to the host [125]. IL-10 is broadly  
337 expressed by many immune cells, but cell type-specific signals also exist; IL-10 production is  
338 tightly regulated by changes in the chromatin structure, *IL10* gene transcription, and post-  
339 transcriptional regulatory mechanisms [126]. IL-10 has been associated with HIV immune  
340 dysregulation, e.g., impaired CD4+ T cell activation [58], and more recently, IL-10 has been shown  
341 to play a critical role in the maintenance of viral persistence [56, 57]. Among ART-suppressed  
342 PLWH, higher levels of IL-10 measured in blood and lymph nodes were significantly associated  
343 with HIV reservoir size (HIV integrated DNA) [57]. In SIV infected macaques, plasma IL-10 and  
344 IL-10 gene expression was associated with viral reservoir size (SIV DNA) in blood and lymph  
345 nodes, and *in vivo* neutralization of soluble IL-10 was shown to reduce B cell follicle maintenance  
346 [56].

347         There was also a statistically significant inverse association between HIV usRNA and  
348 genes associated with the host innate immune response (e.g., *TLR7*), while gene set enrichment  
349 also identified TLR4, associated with microbial translocation, to be significantly associated with  
350 HIV usRNA. These findings support the idea that HIV reservoir may not be entirely “quiescent”  
351 during ART and that ongoing residual viral transcription contributes to harmful persistent host  
352 immune activation even during ART suppression. *TLR7* encodes for a member of toll-like receptor  
353 family of genes which plays critical role in pathogen recognition, activation of the innate immune  
354 response, and functions as a bridge between innate and adaptive immunity [127]. TLR7 is a  
355 pattern recognition receptor that can sense HIV single-stranded RNA (ssRNA) [128, 129]. TLR7  
356 agonist administration has been associated with delayed viral rebound [130] and reduced viral  
357 reservoirs in non-human primate studies [131]. A human clinical trial of the TLR7 agonist GS-

358 9620 recently demonstrated a delay in viral rebound in HIV controllers after cessation of ART  
359 (NCT05281510) [132]. Interestingly, given that *TLR7* is located on the X chromosome, host *TLR7*  
360 transcriptional activity has been linked to acute viremia in HIV+ women (linked to type I interferon  
361 production) [133] as well as with enhanced innate immune function (i.e., plasmacytoid dendritic  
362 cell IFN- $\alpha$  and TNF- $\alpha$  production) [134]. Validation of our findings in female HIV+ cohorts will be  
363 critical for determining whether the host-viral dynamics described in our predominantly male study  
364 population are more pronounced in women, exhibiting a TLR7 signaling “dose-response” effect  
365 due to differential X inactivation in females [133]. Finally, another host innate pattern recognition  
366 receptor statistically significantly associated with HIV usRNA was *TLR4*, which was demonstrated  
367 in the pathway-based analyses linking *TLR4* to several gene sets involved in LPS-mediated  
368 signaling and IL-17 production (**Fig 4**). Our data add to prior studies linking bacterial gut  
369 translocation, systemic inflammation, immune activation, and HIV persistence [135-140].

370         The most statistically significant association with HIV usRNA was a novel association with  
371 *KCNJ2*, a gene that encodes for an inwardly rectifying potassium channel, Kir2.1. These  
372 potassium ion channels have been shown in prior lab studies to regulate HIV-1 entry and release  
373 [32]. In our analyses, a two-fold increase in HIV transcription ( $q=0.003$ ) was associated with a  
374 9.7% decrease in *KCNJ2* expression, as well as an 8.4% decrease in *KCNJ2-AS1* (encodes for  
375 *KCNJ2* antisense RNA 1) expression ( $q=0.012$ ). Potassium channels, including inwardly rectifying  
376 K<sup>+</sup> channels, have been shown to regulate the life cycle of various viruses (e.g., Ebola [141], SIV  
377 [142]). Tight regulation of potassium ion concentrations have been shown to play a critical role in  
378 HIV-1 virus production in CD4<sup>+</sup> T cells in cell culture models [143]. HIV Nef protein has been  
379 shown to increase K<sup>+</sup> concentrations in cells [144], and in turn, changes in K<sup>+</sup> concentration have  
380 been shown to regulate the HIV life cycle (e.g., viral entry, replication, and release) [32]. A small  
381 molecule inhibitor against Kir 2.1 has been recently identified [145]. The observed association  
382 between HIV usRNA and *KCNJ2*, as well with its antisense RNA, *KCNJ2-AS1*, might then suggest

383 a potential novel mechanism – targeting specific types of potassium channels – to reduce the HIV  
384 reservoir size.

385 We also observed a novel association with *GJB2*, which encodes for gap junction beta 2  
386 protein (also known as *CX26*, encoding for connexin 26). Gap junction proteins act as cell-cell  
387 communication channels to transport signaling molecules (e.g., K<sup>+</sup>, Ca<sup>+</sup>, ATP) [33, 34], and  
388 HIV-1 is thought to exploit these communication channels to disseminate infection as well as  
389 associated inflammation even in the absence of viral replication [46, 47]. As with *KCNJ2*, the  
390 observed association with *GJB2*, might suggest potential novel targets for limiting the HIV  
391 reservoir size.

392 We did not observe statistically significant associations with HIV intact DNA and host  
393 genes in the total study population. However, HIV intact DNA was undetectable in 48% of our  
394 measured samples, while for example, total DNA was measurable in 95% of samples (**Fig 2**).  
395 With so many samples below the limit of detection for intact DNA, the statistical power to detect  
396 differential gene expression is much lower for this assay than for the other HIV reservoir assays  
397 included in our study [146, 147]. Thus, we performed additional analyses restricted to the largest  
398 homogenous ancestral population (European ancestry subgroup) and performed pathway  
399 analyses to aggregate individual genes into immunologically relevant “gene sets” to test for an  
400 association with HIV reservoir size. In this way, we were able to enhance the ability to detect  
401 trends with HIV intact DNA. Higher HIV intact DNA was marginally associated with upregulation  
402 of *AGL* (involved in glycogen metabolism) [148-150] and *PLGLB1* (involved in thrombin clot  
403 degradation) [151-153] in the European ancestry subgroup (**Supplement Table 5**). Glycogen  
404 degradation involves breaking down stored glucose for immediate release and availability, and it  
405 has also been shown to play a key role in regulating the inflammatory immune response [150].  
406 Antibody glycosylation has also been associated with inflammation-associated disease [150,  
407 154], as well as time-to-viral rebound after ART interruption, a clinical definition of HIV reservoir  
408 size [148-150]. Besides its role in thrombolysis, *PLGLB1* has previously been associated with a



409 replication-competent expanded HIV-1 clone described in a patient with squamous cell carcinoma  
410 (AMBI-1 integration) [155]; here it is associated with HIV intact DNA, which estimates the  
411 replication-competent HIV reservoir. Thus, the trends with *AGL* and *PLGLB1*, if further validated,  
412 might reflect that a larger “replication-competent” HIV reservoir contribute to vascular and  
413 metabolic complications that have been previously reported in HIV+ ART-suppressed individuals  
414 [44, 45, 77-80] (**Supplemental Fig 4**).

415         The study has several limitations that deserve mention. First, although the HIV reservoir  
416 has been shown to be relatively stable over time [17, 156, 157], our cross-sectional design  
417 provides a “snapshot” of the HIV reservoir after a median of 5.1 years of ART suppression and  
418 makes interpretation of the gene associations challenging. However, based on the known  
419 functions of the top gene hits, we conclude that some of the host genes identified in our analyses  
420 might reflect potential drivers of the HIV reservoir size (**Supplemental Fig 2**), while other host  
421 genes represent the impact of persistent HIV (**Supplemental Fig 3-4**). Indeed, the true *in vivo*  
422 associations might involve more complex feedback pathways between the HIV reservoir and host  
423 responses. Second, as is characteristic of our San Francisco-based HIV+ population, our study  
424 included mostly males of European ancestry. We accounted for this using well-established  
425 methods to adjust for population stratification bias [35, 158], as well as the use of PEERs, which  
426 help account for residual variance that often hampers RNA-seq data [159]. Nonetheless, it is  
427 important that these results be replicated in larger studies, especially those including women and  
428 individuals from different ethnic backgrounds. Third, the majority of the HIV reservoir persists in  
429 lymphoid tissues, not in the periphery [160]. However, recent data suggests that the tissue  
430 compartment largely reflects (and is the likely source of) the peripheral compartment [161-163].  
431 Thus, it will be important to determine whether the results from our study are generalizable to the  
432 tissue HIV reservoir in future studies. Finally, we specifically chose to exclude HIV “elite”  
433 controllers in our study, since most people living with HIV do not fall within the ~1% of the HIV+  
434 population able to suppress virus in the absence of therapy. Instead, the focus of our study was

435 to determine other (uninvestigated) host gene expression associated with the HIV reservoir  
436 (signals that might be lost amidst a study population enriched for previously reported strong  
437 genetic effects, such as with HLA and/or *CCR5Δ32*).

438 Overall, our findings describe novel and immunologically relevant host genetic  
439 associations with the HIV+ reservoir. These include potential mechanisms inhibiting cell  
440 proliferation to limit the size of the overall HIV reservoir, as well as compensatory host  
441 downregulation of harmful persistent innate immune activation and inflammation (e.g., toll-like  
442 receptor, IL-1 $\beta$ /NLRP3 inflammasome, microbial translocation, IL-10 signaling etc.). Finally, the  
443 strongest association with HIV transcription was with *KCNJ2*, a potential novel mechanism by  
444 which the host restricts residual HIV propagation via inwardly rectifying potassium channels.  
445 Additional studies are needed to validate these findings using approaches functionally and  
446 epidemiologically like CRISPR-Cas9 editing and expanding these studies to include more diverse  
447 patient populations, including female and non-European ancestry individuals, using longitudinal  
448 samples.

449

## 450 **Materials and Methods**

### 451 **Study Participants**

452 HIV+ ART-suppressed non-controllers from the UCSF SCOPE and Options HIV+ cohorts  
453 were included in the study. Inclusion criteria were laboratory-confirmed HIV-1 infection, availability  
454 of cryopreserved peripheral blood mononuclear cells (PBMCs), and plasma HIV RNA levels below  
455 the limit of assay quantification for at least 24 months at the time of biospecimen collection. We  
456 excluded individuals HIV “elite controllers” to focus on genetic variants that drive HIV persistence  
457 among non-controllers during ART suppression but also analyzed previously reported strong  
458 genetic effects associated with HIV+ elite control [164-166]. The estimated date of detected  
459 infection (EDDI) was calculated for each study participant to determine recency of infection in  
460 relation to ART initiation using the Infection Dating Tool (<https://tools.incidence->

461 estimation.org/idt/) [167]. Additional exclusion criteria were potential factors that might influence  
462 HIV reservoir quantification, including recent hospitalization, infection requiring antibiotics,  
463 vaccination, or exposure to immunomodulatory drugs in the six months prior to sampling timepoint.  
464 The research was approved by the UCSF Committee on Human Research (CHR), and all  
465 participants provided written informed consent.

466

### 467 **HIV Reservoir Quantification**

468 Cryopreserved PBMCs were enriched for CD4+ T cells (StemCell, Vancouver, Canada),  
469 and DNA and RNA were extracted from CD4+ T cells using the AllPrep Universal Kit (Qiagen,  
470 Hilden, Germany). Cell-associated total HIV DNA and unspliced RNA were quantified by an in-  
471 house quantitative polymerase chain reaction (qPCR) TaqMan assay using HIV-1 long terminal  
472 repeat (LTR)-specific primers as previously described [43]. Participant specimens were assayed  
473 with up to 800 ng of total cellular RNA or DNA in replicate reaction wells and copy number  
474 determined by extrapolation against a 7-point standard curve (1–10,000 copies/second)  
475 performed in triplicate. HIV intact DNA was quantified by targeting five regions on the HIV  
476 genome, including highly conserved regions and positions that are frequently deleted or  
477 hypermutated [31]. Optimized restriction enzyme digestion was used to prepare the genomic DNA  
478 for droplet formation while minimizing the amount of shearing within the viral genome. The  
479 protocol targeted 5 regions in the HIV genome across two droplet digital PCR (ddPCR) assays.  
480 Droplet generation and thermocycling were performed according to manufacturer instructions.  
481 This multiplex ddPCR assay allowed the analysis of potentially replication-competent (“intact”)  
482 proviral genomes by quantifying the number of droplets positive for 3 targets per assay. Two  
483 targets in a housekeeping gene (*RPP30*) were used to quantify all cells, and a target in the T cell  
484 receptor D gene (*TRD*) was used to normalize the HIV copy numbers per  $1 \times 10^6$  CD4+ T cells. A  
485 DNA shearing index (DSI) was then calculated, and mathematically corrected for residual DNA

486 shearing as measured by *RPP30* targets to calculate the estimated number of intact proviral  
487 genomes per million CD4+ T cells after correcting for shearing [42].

488

### 489 **Host RNA sequencing**

490 A separate aliquot of the extracted RNA from CD4+ T cells was then used to perform host  
491 RNA sequencing. HTStream pre-processing pipeline ([s4hts.github.io/htstream/](https://s4hts.github.io/htstream/)) was used for  
492 removing PCR duplicates, adapters, N characters, PolyA/T sequences, Phix contaminants, and  
493 poor-quality sequences (with quality score <20 with sliding window of 10 base pairs). The quality  
494 of raw reads was assessed using FastQC [168]. All samples had a per base quality score and  
495 sequence quality score >30. RNA-seq reads were then mapped to the human genome (GRCh38)  
496 [169] with a corresponding annotation file from the GENCODE project [170]. Alignment and gene  
497 quantification were performed using the STAR alignment tool and its quantification protocols [171-  
498 173]. Gene expression was converted to counts per million (CPM). To normalize the distribution  
499 of expression values across the experiment, the trimmed mean of M-values (TMM) [174] was  
500 used for sample-specific adjustment. Low-expressed genes (<1 CPM for all samples) were  
501 removed. The mean-variance trend was estimated [175] to assign observational weights based  
502 on predicted variance on log<sub>2</sub>-counts per million (log-CPM) using the Limma-Voom pipeline [176].

503

### 504 **Differential Gene Expression Analysis**

505 Multivariate linear models were fit for each of the three measures of the HIV reservoir size  
506 using the Limma-Voom workflow [175, 176], a quantitative weighting method that utilizes variance  
507 modeling to accommodate for residual technical and/or biological heterogeneity [175]. For all  
508 analyses, in order to account for potential population stratification bias (i.e., systematic differences  
509 in results due to ancestry rather than association of genes with disease) we used well-established  
510 methods to account for this by (1) calculating and including the first five principal components  
511 (PCs) as covariates in the multivariate models [35] and (2) performing sensitivity analyses among

512 the largest subgroup, individuals of European ancestry. Eigenvalues were calculated to generate  
513 genetic principal components (PC) to adjust for ancestry [35]. Multivariate models also included  
514 covariates for sex, age, timing of ART initiation, and nadir CD4+ T cell count (duration of ART  
515 suppression and maximum pre-ART viral load did not significantly improve the fit of the models  
516 and were not included as covariates in the final models), as well as PEERs (probabilistic  
517 estimation of expression residuals) to control for additional systematic sources of bias [159].  
518 Model fit was assessed using a lambda genomic coefficient close to 1 [177]. Statistical  
519 significance was determined using a false discovery rate (FDR) q-value threshold of <0.05.

520

### 521 **Gene Set Enrichment Analyses and Network Analyses**

522 For each of the three HIV reservoir measures, we also performed gene set enrichment analyses  
523 (GSEA) to more broadly evaluate whether specific immune pathways were linked to each HIV  
524 reservoir measurement. Genes from the entire transcriptome were first rank-ordered by q-values  
525 from the differential gene expression analysis for each HIV reservoir measure, and then the rank-  
526 ordering was used to identify immunologic pathways that were enriched from our dataset, using  
527 the Gene Ontology Biological Processes (GO-BP) database [178]. For the HIV usRNA analyses,  
528 for which there were several statistically significant differentially expressed genes (even after  
529 multiple-testing), we performed network analyses to better cluster and visualize the statistically  
530 significant results. Using ClueGo, a network analysis application [48], only statistically significant  
531 and marginally significant genes ( $q < 0.25$ ) were included to calculate Kappa statistics that allowed  
532 more meaningful visualization of potential biologically relevant pathways (**Fig 4**).

533 **FIGURE LEGENDS**

534 **Figure 1.** Principal component analysis (PCA) plot of the population structure. Principal  
535 component analysis (PCA) plot of the population structure of the full study cohort (a). Secondary  
536 PCA plot of the European ancestry subpopulation only (b) defined by the dashed box in the lower  
537 left of panel (a). Genetic PCs were calculated from genetic data from our whole exome analysis  
538 [25]. Most of the population was of European ancestry (bottom left of) (a) some continued  
539 variability. Some continued variability was observed in European ancestry subgroup (b). Self-  
540 identified race/ethnicity shown in the legend. Frequencies for participants were recorded as:  
541 White/European American (62%), Black/African American (14%), Hispanic/Latino (11%), Mixed  
542 Ethnicity/Multiracial (6%), Asian (4%), Pacific Islander (2%), Native American (<1%), and Middle  
543 Eastern (<1%).

544  
545 **Figure 2.** Correlations between three measures of HIV reservoir size. HIV unspliced RNA  
546 (usRNA) was significantly correlated with (a) HIV Total DNA (tDNA) and (b) HIV intact DNA; (c)  
547 tDNA and intact DNA were not correlated with one another.

548  
549 **Figure 3.** Measures of the HIV reservoir from peripheral CD4+ T cells were associated with timing  
550 of ART initiation. Panels A-D correspond to HIV tDNA, HIV usRNA, RNA/DNA, and Intact DNA,  
551 respectively. Spearman correlation and corresponding p-value are shown in each case. Earlier  
552 timing of ART initiation (<6 months from infection) was statistically significantly associated with  
553 smaller HIV intact DNA, tDNA, and usRNA.

554  
555 **Figure 4.** Network analysis of the top differentially expressed genes (see **Table 2** and  
556 **Supplemental Table 2**) associated with HIV unspliced RNA demonstrated that the top significant  
557 genes mapped to immunologic pathways involving bacterial translocation (e.g., TLR4 signaling,  
558 activated by bacterial lipopolysaccharide, LPS) and pro-inflammatory responses (e.g., IL-1 $\beta$

559 signaling, NLRP3 inflammasome assembly, Th2 cell cytokine production). A Benjamini-Hochberg  
560 false discovery rate (FDR) of  $q < 0.05$  was used to generate nodes (circles) based on kappa scores  
561  $\geq 0.4$ . The size of the nodes reflects the enrichment significance of the terms, and the different  
562 colors represent distinct functional groups.

563

564 **Figure 5.** Network analysis of the top statistically significant gene sets associated with HIV  
565 unspliced RNA (see **Supplement Table 4**). Gene sets related to immunologic pathways involving  
566 bacterial translocation (e.g., response to bacterium, LPS-mediated signaling pathway), and  
567 inflammatory signaling (e.g., IL-1 $\beta$ , IL-6, IL-10, TNF- $\alpha$ ), were significantly associated with HIV  
568 usRNA. A Benjamini-Hochberg false discovery rate (FDR) of  $q < 0.05$  was used to generate nodes  
569 (circles) based on kappa scores  $\geq 0.4$ . The size of the nodes reflects the enrichment significance  
570 of the terms, and the different colors represent distinct functional groups.

571 **References:**

- 572 1. Turk G, Seiger K, Lian X, Sun W, Parsons EM, Gao C, et al. A Possible Sterilizing Cure of HIV-1  
573 Infection Without Stem Cell Transplantation. *Ann Intern Med.* 2022;175(1):95-100. Epub 2021/11/17. doi:  
574 10.7326/L21-0297. PubMed PMID: 34781719; PubMed Central PMCID: PMCPMC9215120.
- 575 2. Hutter G, Nowak D, Mossner M, Ganepola S, Mussig A, Allers K, et al. Long-term control of HIV  
576 by CCR5 Delta32/Delta32 stem-cell transplantation. *N Engl J Med.* 2009;360(7):692-8. Epub 2009/02/14.  
577 doi: 10.1056/NEJMoa0802905. PubMed PMID: 19213682.
- 578 3. Gupta RK, Abdul-Jawad S, McCoy LE, Mok HP, Peppas D, Salgado M, et al. HIV-1 remission  
579 following CCR5Delta32/Delta32 haematopoietic stem-cell transplantation. *Nature.* 2019;568(7751):244-8.  
580 Epub 2019/03/06. doi: 10.1038/s41586-019-1027-4. PubMed PMID: 30836379; PubMed Central PMCID:  
581 PMCPMC7275870.
- 582 4. Ndung'u T, McCune JM, Deeks SG. Why and where an HIV cure is needed and how it might be  
583 achieved. *Nature.* 2019;576(7787):397-405. doi: 10.1038/s41586-019-1841-8. PubMed PMID:  
584 WOS:000504660500088.
- 585 5. Katlama C, Deeks SG, Autran B, Martinez-Picado J, Van Lunzen J, Rouzioux C, et al. Barriers to  
586 a cure for HIV: new ways to target and eradicate HIV-1 reservoirs. *The Lancet.* 2013;381(9883):2109-17.
- 587 6. Esté JA, Cihlar T. Current status and challenges of antiretroviral research and therapy. *Antiviral*  
588 *research.* 2010;85(1):25-33.
- 589 7. Gay CL, Kuruc JD, Falcinelli SD, Warren JA, Reifeis SA, Kirchherr JL, et al. Assessing the impact  
590 of AGS-004, a dendritic cell-based immunotherapy, and vorinostat on persistent HIV-1 Infection. *Sci Rep.*  
591 2020;10(1):5134. Epub 2020/03/22. doi: 10.1038/s41598-020-61878-3. PubMed PMID: 32198428;  
592 PubMed Central PMCID: PMCPMC7083965.
- 593 8. Fidler S, Stohr W, Pace M, Dorrell L, Lever A, Pett S, et al. Antiretroviral therapy alone versus  
594 antiretroviral therapy with a kick and kill approach, on measures of the HIV reservoir in participants with  
595 recent HIV infection (the RIVER trial): a phase 2, randomised trial. *Lancet.* 2020;395(10227):888-98.  
596 Epub 2020/02/23. doi: 10.1016/S0140-6736(19)32990-3. PubMed PMID: 32085823.
- 597 9. Gutierrez C, Serrano-Villar S, Madrid-Elena N, Perez-Elias MJ, Martin ME, Barbas C, et al.  
598 Bryostatin-1 for latent virus reactivation in HIV-infected patients on antiretroviral therapy. *AIDS.*



- 599 2016;30(9):1385-92. Epub 2016/02/19. doi: 10.1097/QAD.0000000000001064. PubMed PMID:  
600 26891037.
- 601 10. Vibholm L, Schleimann MH, Hojen JF, Benfield T, Offersen R, Rasmussen K, et al. Short-Course  
602 Toll-Like Receptor 9 Agonist Treatment Impacts Innate Immunity and Plasma Viremia in Individuals With  
603 Human Immunodeficiency Virus Infection. *Clin Infect Dis*. 2017;64(12):1686-95. Epub 2017/03/23. doi:  
604 10.1093/cid/cix201. PubMed PMID: 28329286; PubMed Central PMCID: PMC5849129.
- 605 11. Riddler SA, Para M, Benson CA, Mills A, Ramgopal M, DeJesus E, et al. Vesatolimod, a Toll-like  
606 Receptor 7 Agonist, Induces Immune Activation in Virally Suppressed Adults Living With Human  
607 Immunodeficiency Virus-1. *Clin Infect Dis*. 2021;72(11):e815-e24. Epub 2020/10/13. doi:  
608 10.1093/cid/ciaa1534. PubMed PMID: 33043969.
- 609 12. Elliott JH, McMahon JH, Chang CC, Lee SA, Hartogensis W, Bumpus N, et al. Short-term  
610 administration of disulfiram for reversal of latent HIV infection: a phase 2 dose-escalation study. *Lancet*  
611 *HIV*. 2015;2(12):e520-9. Epub 2015/11/29. doi: 10.1016/S2352-3018(15)00226-X. PubMed PMID:  
612 26614966; PubMed Central PMCID: PMC5108570.
- 613 13. Chun TW, Justement JS, Moir S, Hallahan CW, Maenza J, Mullins JI, et al. Decay of the HIV  
614 reservoir in patients receiving antiretroviral therapy for extended periods: implications for eradication of  
615 virus. *J Infect Dis*. 2007;195(12):1762-4. Epub 2007/05/02. doi: 10.1086/518250. PubMed PMID:  
616 17492591.
- 617 14. Hocqueloux L, Avettand-Fènoël V, Jacquot S, Prazuck T, Legac E, Mélard A, et al. Long-term  
618 antiretroviral therapy initiated during primary HIV-1 infection is key to achieving both low HIV reservoirs  
619 and normal T cell counts. *Journal of Antimicrobial Chemotherapy*. 2013;68(5):1169-78. doi:  
620 10.1093/jac/dks533.
- 621 15. Etemad B, Esmailzadeh E, Li JZ. Learning From the Exceptions: HIV Remission in Post-  
622 treatment Controllers. *Front Immunol*. 2019;10:1749. Epub 2019/07/24. doi: 10.3389/fimmu.2019.01749.  
623 PubMed PMID: 31396237; PubMed Central PMCID: PMC6668499.
- 624 16. Fajnzylber J, Sharaf R, Hutchinson JN, Aga E, Bosch RJ, Hartogensis W, et al. Frequency of post  
625 treatment control varies by antiretroviral therapy restart and viral load criteria. *AIDS*. 2021;35(13):2225-7.

- 626 doi: 10.1097/QAD.0000000000002978. PubMed PMID: 34127579; PubMed Central PMCID:  
627 PMCPMC8490281.
- 628 17. Bachmann N, von Siebenthal C, Vongrad V, Turk T, Neumann K, Beerenwinkel N, et al.  
629 Determinants of HIV-1 reservoir size and long-term dynamics during suppressive ART. *Nat Commun.*  
630 2019;10(1):3193. Epub 2019/07/22. doi: 10.1038/s41467-019-10884-9. PubMed PMID: 31324762;  
631 PubMed Central PMCID: PMCPMC6642170.
- 632 18. Gianella S, Rawlings SA, Nakazawa M, Chaillon A, Strain M, Layman L, et al. Sex differences in  
633 HIV Persistence and Reservoir Size during Aging. *Clin Infect Dis.* 2021. Epub 20211006. doi:  
634 10.1093/cid/ciab873. PubMed PMID: 34612493.
- 635 19. Gandhi M, Bacchetti P, Miotti P, Quinn TC, Veronese F, Greenblatt RM. Does Patient Sex Affect  
636 Human Immunodeficiency Virus Levels? *Clinical Infectious Diseases.* 2002;35(3):313-22. doi:  
637 10.1086/341249.
- 638 20. Deeks SG, Bacchetti P, Chomont N, Karn J, Lewin SR, Solomon A, et al. Sex-Based Differences  
639 in Human Immunodeficiency Virus Type 1 Reservoir Activity and Residual Immune Activation. *The*  
640 *Journal of Infectious Diseases.* 2019;219(7):1084-94. doi: 10.1093/infdis/jiy617.
- 641 21. de Roda Husman AM, Koot M, Cornelissen M, Keet IP, Brouwer M, Broersen SM, et al.  
642 Association between CCR5 genotype and the clinical course of HIV-1 infection. *Ann Intern Med.*  
643 1997;127(10):882-90. Epub 1998/02/12. doi: 10.7326/0003-4819-127-10-199711150-00004. PubMed  
644 PMID: 9382366.
- 645 22. Dean M, Carrington M, Winkler C, Huttley GA, Smith MW, Allikmets R, et al. Genetic restriction of  
646 HIV-1 infection and progression to AIDS by a deletion allele of the CKR5 structural gene. *Hemophilia*  
647 *Growth and Development Study, Multicenter AIDS Cohort Study, Multicenter Hemophilia Cohort Study,*  
648 *San Francisco City Cohort, ALIVE Study.* *Science.* 1996;273(5283):1856-62. Epub 1996/09/27. doi:  
649 10.1126/science.273.5283.1856. PubMed PMID: 8791590.
- 650 23. Rappaport J, Cho YY, Hendel H, Schwartz EJ, Schachter F, Zagury JF. 32 bp CCR-5 gene  
651 deletion and resistance to fast progression in HIV-1 infected heterozygotes. *Lancet.* 1997;349(9056):922-  
652 3. Epub 1997/03/29. doi: 10.1016/S0140-6736(05)62697-9. PubMed PMID: 9093257.

- 653 24. Kulkarni S, Lied A, Kulkarni V, Rucevic M, Martin MP, Walker-Sperling V, et al. CCR5AS lncRNA  
654 variation differentially regulates CCR5, influencing HIV disease outcome. *Nat Immunol.* 2019;20(7):824-  
655 34. Epub 2019/06/19. doi: 10.1038/s41590-019-0406-1. PubMed PMID: 31209403; PubMed Central  
656 PMCID: PMC6584055.
- 657 25. Siegel DA, Thanh C, Wan E, Hoh R, Hobbs K, Pan T, et al. Host Variation in Interferon, MHC  
658 Class I, Glycosylation, and Viral Transcription Genes Predict HIV Persistence. 2022. doi:  
659 10.1101/2021.10.31.466670.
- 660 26. Francesconi M, Lehner B. The effects of genetic variation on gene expression dynamics during  
661 development. *Nature.* 2014;505(7482):208-11. Epub 2013/11/26. doi: 10.1038/nature12772. PubMed  
662 PMID: 24270809.
- 663 27. Williams RB, Chan EK, Cowley MJ, Little PF. The influence of genetic variation on gene  
664 expression. *Genome Res.* 2007;17(12):1707-16. Epub 2007/12/08. doi: 10.1101/gr.6981507. PubMed  
665 PMID: 18063559.
- 666 28. Yazar S, Alquicira-Hernandez J, Wing K, Senabouth A, Gordon MG, Andersen S, et al. Single-  
667 cell eQTL mapping identifies cell type-specific genetic control of autoimmune disease. *Science.*  
668 2022;376(6589):eabf3041. Epub 2022/04/08. doi: 10.1126/science.abf3041. PubMed PMID: 35389779.
- 669 29. Shahbaz S, Jovel J, Elahi S. Differential transcriptional and functional properties of regulatory T  
670 cells in HIV-infected individuals on antiretroviral therapy and long-term non-progressors. *Clin Transl*  
671 *Immunology.* 2021;10(5):e1289. Epub 20210526. doi: 10.1002/cti2.1289. PubMed PMID: 34094548;  
672 PubMed Central PMCID: PMC6584055.
- 673 30. Petkov S, Chiodi F. Distinct transcriptomic profiles of naive CD4+T cells distinguish HIV-1  
674 infected patients initiating antiretroviral therapy at acute or chronic phase of infection. *Genomics.*  
675 2021;113(6):3487-500. doi: 10.1016/j.ygeno.2021.08.014. PubMed PMID: WOS:000703998100004.
- 676 31. Levy CN, Hughes SM, Roychoudhury P, Reeves DB, Amstuz C, Zhu H, et al. A highly  
677 multiplexed droplet digital PCR assay to measure the intact HIV-1 proviral reservoir. *Cell Rep Med.*  
678 2021;2(4):100243. Epub 2021/05/06. doi: 10.1016/j.xcrm.2021.100243. PubMed PMID: 33948574;  
679 PubMed Central PMCID: PMC6584055.

- 680 32. Dubey RC, Mishra N, Gaur R. G protein-coupled and ATP-sensitive inwardly rectifying potassium  
681 ion channels are essential for HIV entry. *Scientific reports*. 2019;9(1):1-9.
- 682 33. Sáez JC, Nicholson B. Connexin and Pannexin Based Channels in the Nervous System. From  
683 Molecules to Networks 2014. p. 257-83.
- 684 34. Goodenough DA, Paul DL. Gap Junctions. *Cold Spring Harbor Perspectives in Biology*.  
685 2009;1(1):a002576-a. doi: 10.1101/cshperspect.a002576.
- 686 35. Price AL, Patterson NJ, Plenge RM, Weinblatt ME, Shadick NA, Reich D. Principal components  
687 analysis corrects for stratification in genome-wide association studies. *Nature genetics*. 2006;38(8):904-9.  
688 Epub 2006/07/25. doi: 10.1038/ng1847. PubMed PMID: 16862161.
- 689 36. Ho YC, Shan L, Hosmane NN, Wang J, Laskey SB, Rosenbloom DI, et al. Replication-competent  
690 noninduced proviruses in the latent reservoir increase barrier to HIV-1 cure. *Cell*. 2013;155(3):540-51.  
691 Epub 2013/11/19. doi: 10.1016/j.cell.2013.09.020. PubMed PMID: 24243014; PubMed Central PMCID:  
692 PMCPMC3896327.
- 693 37. Bruner KM, Murray AJ, Pollack RA, Soliman MG, Laskey SB, Capoferri AA, et al. Defective  
694 proviruses rapidly accumulate during acute HIV-1 infection. *Nat Med*. 2016;22(9):1043-9. Epub  
695 2016/08/09. doi: 10.1038/nm.4156. PubMed PMID: 27500724; PubMed Central PMCID:  
696 PMCPMC5014606.
- 697 38. Procopio FA, Fromentin R, Kulpa DA, Brehm JH, Bebin AG, Strain MC, et al. A Novel Assay to  
698 Measure the Magnitude of the Inducible Viral Reservoir in HIV-infected Individuals. *EBioMedicine*.  
699 2015;2(8):872-81. Epub 2015/10/02. doi: 10.1016/j.ebiom.2015.06.019. PubMed PMID: 26425694;  
700 PubMed Central PMCID: PMC4563128.
- 701 39. Eriksson S, Graf EH, Dahl V, Strain MC, Yukl SA, Lysenko ES, et al. Comparative analysis of  
702 measures of viral reservoirs in HIV-1 eradication studies. *PLoS Pathog*. 2013;9(2):e1003174. doi:  
703 10.1371/journal.ppat.1003174. PubMed PMID: 23459007; PubMed Central PMCID: PMCPMC3573107.
- 704 40. Bruner KM, Wang Z, Simonetti FR, Bender AM, Kwon KJ, Sengupta S, et al. A quantitative  
705 approach for measuring the reservoir of latent HIV-1 proviruses. *Nature*. 2019;566(7742):120-5. doi:  
706 10.1038/s41586-019-0898-8. PubMed PMID: 30700913.

- 707 41. Eriksson S, Graf EH, Dahl V, Strain MC, Yukl SA, Lysenko ES, et al. Comparative analysis of  
708 measures of viral reservoirs in HIV-1 eradication studies. *PLoS pathogens*. 2013;9(2):e1003174. Epub  
709 2013/03/06. doi: 10.1371/journal.ppat.1003174. PubMed PMID: 23459007; PubMed Central PMCID:  
710 PMC3573107.
- 711 42. Levy CN, Hughes SM, Roychoudhury P, Amstuz C, Zhu H, Huang ML, et al. HIV reservoir  
712 quantification by five-target multiplex droplet digital PCR. *STAR Protoc*. 2021;2(4):100885. Epub  
713 20211011. doi: 10.1016/j.xpro.2021.100885. PubMed PMID: 34693363; PubMed Central PMCID:  
714 PMCPMC8517383.
- 715 43. Malnati MS, Scarlatti G, Gatto F, Salvatori F, Cassina G, Rutigliano T, et al. A universal real-time  
716 PCR assay for the quantification of group-M HIV-1 proviral load. *Nat Protoc*. 2008;3(7):1240-8. Epub  
717 2008/07/05. doi: 10.1038/nprot.2008.108. PubMed PMID: 18600229.
- 718 44. Astorga-Gamaza A, Buzon MJ. The active human immunodeficiency virus reservoir during  
719 antiretroviral therapy: emerging players in viral persistence. *Curr Opin HIV AIDS*. 2021;16(4):193-9. doi:  
720 10.1097/COH.0000000000000685. PubMed PMID: 33973900.
- 721 45. Pierson T, McArthur J, Siliciano RF. Reservoirs for HIV-1: mechanisms for viral persistence in the  
722 presence of antiviral immune responses and antiretroviral therapy. *Annu Rev Immunol*. 2000;18:665-708.  
723 doi: 10.1146/annurev.immunol.18.1.665. PubMed PMID: 10837072.
- 724 46. Malik S, Eugenin EA. Role of Connexin and Pannexin containing channels in HIV infection and  
725 NeuroAIDS. *Neuroscience Letters*. 2019;695:86-90. doi: 10.1016/j.neulet.2017.09.005.
- 726 47. Valdebenito S, Barreto A, Eugenin EA. The role of connexin and pannexin containing channels in  
727 the innate and acquired immune response. *Biochimica et Biophysica Acta (BBA) - Biomembranes*.  
728 2018;1860(1):154-65. doi: 10.1016/j.bbamem.2017.05.015.
- 729 48. Bindea G, Mlecnik B, Hackl H, Charoentong P, Tosolini M, Kirilovsky A, et al. ClueGO: a  
730 Cytoscape plug-in to decipher functionally grouped gene ontology and pathway annotation networks.  
731 *Bioinformatics*. 2009;25(8):1091-3. Epub 20090223. doi: 10.1093/bioinformatics/btp101. PubMed PMID:  
732 19237447; PubMed Central PMCID: PMCPMC2666812.

- 733 49. Mantovani A, Dinarello CA, Molgora M, Garlanda C. Interleukin-1 and Related Cytokines in the  
734 Regulation of Inflammation and Immunity. *Immunity*. 2019;50(4):778-95. Epub 2019/04/18. doi:  
735 10.1016/j.immuni.2019.03.012. PubMed PMID: 30995499; PubMed Central PMCID: PMC7174020.
- 736 50. Gabay C, Lamacchia C, Palmer G. IL-1 pathways in inflammation and human diseases. *Nat Rev*  
737 *Rheumatol*. 2010;6(4):232-41. Epub 2010/02/24. doi: 10.1038/nrrheum.2010.4. PubMed PMID:  
738 20177398.
- 739 51. Dinarello CA. Immunological and inflammatory functions of the interleukin-1 family. *Annu Rev*  
740 *Immunol*. 2009;27:519-50. Epub 2009/03/24. doi: 10.1146/annurev.immunol.021908.132612. PubMed  
741 PMID: 19302047.
- 742 52. Zheng D, Liwinski T, Elinav E. Inflammasome activation and regulation: toward a better  
743 understanding of complex mechanisms. *Cell Discov*. 2020;6:36. Epub 2020/06/19. doi: 10.1038/s41421-  
744 020-0167-x. PubMed PMID: 32550001; PubMed Central PMCID: PMC7280307.
- 745 53. Brenchley JM, Price DA, Schacker TW, Asher TE, Silvestri G, Rao S, et al. Microbial  
746 translocation is a cause of systemic immune activation in chronic HIV infection. *Nat Med*.  
747 2006;12(12):1365-71. Epub 2006/11/23. doi: 10.1038/nm1511. PubMed PMID: 17115046.
- 748 54. Vujkovic-Cvijin I, Dunham RM, Iwai S, Maher MC, Albright RG, Broadhurst MJ, et al. Dysbiosis of  
749 the gut microbiota is associated with HIV disease progression and tryptophan catabolism. *Sci Transl Med*.  
750 2013;5(193):193ra91. Epub 2013/07/12. doi: 10.1126/scitranslmed.3006438. PubMed PMID: 23843452;  
751 PubMed Central PMCID: PMC4094294.
- 752 55. Somsouk M, Estes JD, Deleage C, Dunham RM, Albright R, Inadomi JM, et al. Gut epithelial  
753 barrier and systemic inflammation during chronic HIV infection. *AIDS*. 2015;29(1):43-51. Epub  
754 2014/11/12. doi: 10.1097/QAD.0000000000000511. PubMed PMID: 25387317; PubMed Central PMCID:  
755 PMC4444362.
- 756 56. Harper J, Ribeiro SP, Chan CN, Aid M, Deleage C, Micci L, et al. Interleukin-10 contributes to  
757 reservoir establishment and persistence in SIV-infected macaques treated with antiretroviral therapy. *J*  
758 *Clin Invest*. 2022;132(8). Epub 2022/03/02. doi: 10.1172/JCI155251. PubMed PMID: 35230978; PubMed  
759 Central PMCID: PMC9012284.

- 760 57. Ribeiro SP, Aid M, Dupuy FP, Chan CN, Hultquist JF, Delage C, et al. IL-10 driven memory T cell  
761 survival and Tfh differentiation promote HIV  
762 2 persistence. *BioRxiv*. 2022. doi: doi: <https://doi.org/10.1101/2021.02.26.432955>.
- 763 58. Said EA, Dupuy FP, Trautmann L, Zhang Y, Shi Y, El-Far M, et al. Programmed death-1-induced  
764 interleukin-10 production by monocytes impairs CD4+ T cell activation during HIV infection. *Nature*  
765 *medicine*. 2010;16(4):452-9. Epub 2010/03/09. doi: 10.1038/nm.2106. PubMed PMID: 20208540.
- 766 59. Chomont N, El-Far M, Ancuta P, Trautmann L, Procopio FA, Yassine-Diab B, et al. HIV reservoir  
767 size and persistence are driven by T cell survival and homeostatic proliferation. *Nat Med*. 2009;15(8):893-  
768 900. Epub 2009/06/23. doi: 10.1038/nm.1972. PubMed PMID: 19543283; PubMed Central PMCID:  
769 PMCPMC2859814.
- 770 60. Wagner TA, McLaughlin S, Garg K, Cheung CY, Larsen BB, Styrchak S, et al. HIV latency.  
771 Proliferation of cells with HIV integrated into cancer genes contributes to persistent infection. *Science*.  
772 2014;345(6196):570-3. Epub 20140710. doi: 10.1126/science.1256304. PubMed PMID: 25011556;  
773 PubMed Central PMCID: PMCPMC4230336.
- 774 61. Kattamuri C, Luedeke DM, Nolan K, Rankin SA, Greis KD, Zorn AM, et al. Members of the DAN  
775 family are BMP antagonists that form highly stable noncovalent dimers. *J Mol Biol*. 2012;424(5):313-27.  
776 Epub 20121009. doi: 10.1016/j.jmb.2012.10.003. PubMed PMID: 23063586; PubMed Central PMCID:  
777 PMCPMC3509953.
- 778 62. Hung WT, Wu FJ, Wang CJ, Luo CW. DAN (NBL1) specifically antagonizes BMP2 and BMP4  
779 and modulates the actions of GDF9, BMP2, and BMP4 in the rat ovary. *Biol Reprod*. 2012;86(5):158, 1-9.  
780 Epub 20120531. doi: 10.1095/biolreprod.111.096172. PubMed PMID: 22357543.
- 781 63. Ozaki T, Nakamura Y, Enomoto H, Hirose M, Sakiyama S. Overexpression of DAN gene product  
782 in normal rat fibroblasts causes a retardation of the entry into the S phase. *Cancer Res*. 1995;55(4):895-  
783 900. PubMed PMID: 7850806.
- 784 64. Sung JC, McCarthy S, Turner J, Li CG, Yeatman TJ. The NBL1 tumor suppressor gene is  
785 downregulated in colon cancer by promoter methylation. *Journal of the American College of Surgeons*.  
786 2004;199(3). doi: 10.1016/j.jamcollsurg.2004.05.200.

- 787 65. Hayashi T, Sentani K, Oue N, Ohara S, Teishima J, Anami K, et al. The search for secreted  
788 proteins in prostate cancer by the Escherichia coli ampicillin secretion trap: expression of NBL1 is highly  
789 restricted to the prostate and is related to cancer progression. *Pathobiology*. 2013;80(2):60-9. Epub  
790 20120829. doi: 10.1159/000341396. PubMed PMID: 22948749.
- 791 66. Nakamura Y, Ozaki T, Ichimiya S, Nakagawara A, Sakiyama S. Ectopic expression of DAN  
792 enhances the retinoic acid-induced neuronal differentiation in human neuroblastoma cell lines. *Biochem*  
793 *Biophys Res Commun*. 1998;243(3):722-6. doi: 10.1006/bbrc.1998.8112. PubMed PMID: 9500977.
- 794 67. Bradley T, Kuraoka M, Yeh CH, Tian M, Chen H, Cain DW, et al. Immune checkpoint modulation  
795 enhances HIV-1 antibody induction. *Nat Commun*. 2020;11(1):948. Epub 2020/02/23. doi:  
796 10.1038/s41467-020-14670-w. PubMed PMID: 32075963; PubMed Central PMCID: PMC7031230.
- 797 68. O'Leary NA, Wright MW, Brister JR, Ciufu S, Haddad D, McVeigh R, et al. Reference sequence  
798 (RefSeq) database at NCBI: current status, taxonomic expansion, and functional annotation. *Nucleic*  
799 *acids research*. 2016;44(D1):D733-D45.
- 800 69. Rappu P, Salo AM, Myllyharju J, Heino J. Role of prolyl hydroxylation in the molecular  
801 interactions of collagens. *Essays in biochemistry*. 2019;63(3):325-35.
- 802 70. Shah R, Smith P, Purdie C, Quinlan P, Baker L, Aman P, et al. The prolyl 3-hydroxylases P3H2  
803 and P3H3 are novel targets for epigenetic silencing in breast cancer. *British journal of cancer*.  
804 2009;100(10):1687-96.
- 805 71. Li Y, Chen Y, Ma Y, Nenkov M, Haase D, Petersen I. Collagen prolyl hydroxylase 3 has a tumor  
806 suppressive activity in human lung cancer. *Experimental cell research*. 2018;363(1):121-8.
- 807 72. Hatzimichael E, Dasoula A, Shah R, Syed N, Papoudou-Bai A, Coley HM, et al. The prolyl-  
808 hydroxylase EGLN3 and not EGLN1 is inactivated by methylation in plasma cell neoplasia. *Eur J*  
809 *Haematol*. 2010;84(1):47-51. Epub 2009/09/10. doi: 10.1111/j.1600-0609.2009.01344.x. PubMed PMID:  
810 19737309.
- 811 73. Hatzimichael E, Lo Nigro C, Lattanzio L, Syed N, Shah R, Dasoula A, et al. The collagen prolyl  
812 hydroxylases are novel transcriptionally silenced genes in lymphoma. *Br J Cancer*. 2012;107(8):1423-32.  
813 Epub 2012/09/08. doi: 10.1038/bjc.2012.380. PubMed PMID: 22955849; PubMed Central PMCID:  
814 PMCPMC3494450.



- 815 74. Shah R, Smith P, Purdie C, Quinlan P, Baker L, Aman P, et al. The prolyl 3-hydroxylases P3H2  
816 and P3H3 are novel targets for epigenetic silencing in breast cancer. *Br J Cancer*. 2009;100(10):1687-96.  
817 Epub 2009/05/14. doi: 10.1038/sj.bjc.6605042. PubMed PMID: 19436308; PubMed Central PMCID:  
818 PMCPMC2696763.
- 819 75. Maggi E, Almerigogna F, Del Prete G, Romagnani S. Abnormal B cell helper activity by virus-  
820 infected human CD4+ T cells. *Seminars in Immunology*. 1993;5(6):449-55. doi: 10.1006/smim.1993.1051.
- 821 76. Liszewski MK, Kolev M, Le Friec G, Leung M, Bertram PG, Fara AF, et al. Intracellular  
822 complement activation sustains T cell homeostasis and mediates effector differentiation. *Immunity*.  
823 2013;39(6):1143-57. Epub 2013/12/05. doi: 10.1016/j.immuni.2013.10.018. PubMed PMID: 24315997;  
824 PubMed Central PMCID: PMCPMC3865363.
- 825 77. Kaplan RC, Sinclair E, Landay AL, Lurain N, Sharrett AR, Gange SJ, et al. T cell activation  
826 predicts carotid artery stiffness among HIV-infected women. *Atherosclerosis*. 2011;217(1):207-13. Epub  
827 2011/03/15. doi: 10.1016/j.atherosclerosis.2011.03.011. PubMed PMID: 21492857; PubMed Central  
828 PMCID: PMCPMC3139014.
- 829 78. Lederman MM, Funderburg NT, Sekaly RP, Klatt NR, Hunt PW. Residual immune dysregulation  
830 syndrome in treated HIV infection. *Adv Immunol*. 2013;119:51-83. doi: 10.1016/B978-0-12-407707-  
831 2.00002-3. PubMed PMID: 23886064; PubMed Central PMCID: PMCPMC4126613.
- 832 79. Hunt PW. HIV and Inflammation: Mechanisms and Consequences. *Curr HIV-Aids Rep*.  
833 2012;9(2):139-47. doi: 10.1007/s11904-012-0118-8. PubMed PMID: WOS:000208974200005.
- 834 80. Hunt PW, Sinclair E, Rodriguez B, Shive C, Clagett B, Funderburg N, et al. Gut epithelial barrier  
835 dysfunction and innate immune activation predict mortality in treated HIV infection. *The Journal of*  
836 *Infectious Diseases*. 2014;210(8):1228-38. Epub 2014/04/24. doi: 10.1093/infdis/jiu238. PubMed PMID:  
837 24755434; PubMed Central PMCID: PMC4192038.
- 838 81. Agostini L, Martinon F, Burns K, McDermott MF, Hawkins PN, Tschopp J. NALP3 forms an IL-  
839 1beta-processing inflammasome with increased activity in Muckle-Wells autoinflammatory disorder.  
840 *Immunity*. 2004;20(3):319-25. PubMed PMID: 15030775.

- 841 82. Dinarello CA. Interleukin-1 in the pathogenesis and treatment of inflammatory diseases. *Blood*.  
842 2011;117(14):3720-32. Epub 2011/02/10. doi: 10.1182/blood-2010-07-273417. PubMed PMID:  
843 21304099; PubMed Central PMCID: PMCPMC3083294.
- 844 83. Ridker PM. From C-Reactive Protein to Interleukin-6 to Interleukin-1: Moving Upstream To  
845 Identify Novel Targets for Atheroprotection. *Circ Res*. 2016;118(1):145-56. doi:  
846 10.1161/CIRCRESAHA.115.306656. PubMed PMID: 26837745; PubMed Central PMCID:  
847 PMCPMC4793711.
- 848 84. Kuller LH, Tracy R, Belloso W, De Wit S, Drummond F, Lane HC, et al. Inflammatory and  
849 coagulation biomarkers and mortality in patients with HIV infection. *PLoS Med*. 2008;5(10):e203. PubMed  
850 PMID: 18942885.
- 851 85. Sunil M, Nigalye M, Somasunderam A, Martinez ML, Yu X, Arduino RC, et al. Unchanged Levels  
852 of Soluble CD14 and IL-6 Over Time Predict Serious Non-AIDS Events in HIV-1-Infected People. *AIDS*  
853 *Res Hum Retroviruses*. 2016;32(12):1205-9. doi: 10.1089/AID.2016.0007. PubMed PMID: 27344921;  
854 PubMed Central PMCID: PMCPMC5175436.
- 855 86. Tenorio AR, Zheng Y, Bosch RJ, Krishnan S, Rodriguez B, Hunt PW, et al. Soluble markers of  
856 inflammation and coagulation but not T-cell activation predict non-AIDS-defining morbid events during  
857 suppressive antiretroviral treatment. *The Journal of Infectious Diseases*. 2014;210(8):1248-59. Epub  
858 2014/05/06. doi: 10.1093/infdis/jiu254. PubMed PMID: 24795473; PubMed Central PMCID:  
859 PMC4192039.
- 860 87. Grund B, Baker JV, Deeks SG, Wolfson J, Wentworth D, Cozzi-Lepri A, et al. Relevance of  
861 Interleukin-6 and D-Dimer for Serious Non-AIDS Morbidity and Death among HIV-Positive Adults on  
862 Suppressing Antiretroviral Therapy. *PLoS One*. 2016;11(5):e0155100. doi:  
863 10.1371/journal.pone.0155100. PubMed PMID: 27171281; PubMed Central PMCID: PMCPMC4865234.
- 864 88. Lee SL, Byakwaga H, Boum Y, Burdo T, Williams KC, Lederman MM, et al. Immunologic  
865 Pathways that Predict Mortality in HIV-Infected Ugandans Initiating ART. *The Journal of Infectious*  
866 *Diseases*. 2017;In Review.
- 867 89. So-Armah KA, Tate JP, Chang CH, Butt AA, Gerschenson M, Gibert CL, et al. Do Biomarkers of  
868 Inflammation, Monocyte Activation, and Altered Coagulation Explain Excess Mortality Between HIV

- 869 Infected and Uninfected People? *J Acquir Immune Defic Syndr*. 2016;72(2):206-13. doi:  
870 10.1097/QAI.0000000000000954. PubMed PMID: 27824677.
- 871 90. Unver N, McAllister F. IL-6 family cytokines: Key inflammatory mediators as biomarkers and  
872 potential therapeutic targets. *Cytokine & Growth Factor Reviews*. 2018;41:10-7. doi:  
873 10.1016/j.cytogfr.2018.04.004.
- 874 91. Rutella S, Zavala F, Danese S, Kared H, Leone G. Granulocyte colony-stimulating factor: a novel  
875 mediator of T cell tolerance. *The Journal of Immunology*. 2005;175(11):7085-91.
- 876 92. Jacques P, Elewaut D. Tumor necrosis factor  $\alpha$ -induced proteins: Natural brakes on  
877 inflammation. *Arthritis & Rheumatism*. 2012;64(12):3831-4. doi: 10.1002/art.34664.
- 878 93. Sethi JK, Hotamisligil GS. Metabolic Messengers: tumour necrosis factor. *Nat Metab*.  
879 2021;3(10):1302-12. Epub 20211014. doi: 10.1038/s42255-021-00470-z. PubMed PMID: 34650277.
- 880 94. Heir R, Stellwagen D. TNF-Mediated Homeostatic Synaptic Plasticity: From in vitro to in vivo  
881 Models. *Front Cell Neurosci*. 2020;14:565841. Epub 20200930. doi: 10.3389/fncel.2020.565841. PubMed  
882 PMID: 33192311; PubMed Central PMCID: PMC7556297.
- 883 95. Gough P, Myles IA. Tumor Necrosis Factor Receptors: Pleiotropic Signaling Complexes and  
884 Their Differential Effects. *Front Immunol*. 2020;11:585880. Epub 20201125. doi:  
885 10.3389/fimmu.2020.585880. PubMed PMID: 33324405; PubMed Central PMCID: PMC7723893.
- 886 96. Breviario F, d'Aniello EM, Golay J, Peri G, Bottazzi B, Bairoch A, et al. Interleukin-1-inducible  
887 genes in endothelial cells. Cloning of a new gene related to C-reactive protein and serum amyloid P  
888 component. *J Biol Chem*. 1992;267(31):22190-7. PubMed PMID: 1429570.
- 889 97. Porte R, Davoudian S, Asgari F, Parente R, Mantovani A, Garlanda C, et al. The Long Pentraxin  
890 PTX3 as a Humoral Innate Immunity Functional Player and Biomarker of Infections and Sepsis. *Frontiers*  
891 *in Immunology*. 2019;10. doi: 10.3389/fimmu.2019.00794.
- 892 98. Doni A, Stravalaci M, Inforzato A, Magrini E, Mantovani A, Garlanda C, et al. The Long Pentraxin  
893 PTX3 as a Link Between Innate Immunity, Tissue Remodeling, and Cancer. *Frontiers in Immunology*.  
894 2019;10. doi: 10.3389/fimmu.2019.00712.

- 895 99. Dyer DP, Salanga CL, Johns SC, Valdambri E, Fuster MM, Milner CM, et al. The Anti-  
896 inflammatory Protein TSG-6 Regulates Chemokine Function by Inhibiting Chemokine/Glycosaminoglycan  
897 Interactions. *Journal of Biological Chemistry*. 2016;291(24):12627-40. doi: 10.1074/jbc.M116.720953.
- 898 100. Dyer DP, Thomson JM, Hermant A, Jowitt TA, Handel TM, Proudfoot AEI, et al. TSG-6 Inhibits  
899 Neutrophil Migration via Direct Interaction with the Chemokine CXCL8. *The Journal of Immunology*.  
900 2014;192(5):2177-85. doi: 10.4049/jimmunol.1300194.
- 901 101. Lee TH, Klampfer L, Shows TB, Vilcek J. Transcriptional regulation of TSG6, a tumor necrosis  
902 factor- and interleukin-1-inducible primary response gene coding for a secreted hyaluronan-binding  
903 protein. *J Biol Chem*. 1993;268(9):6154-60. PubMed PMID: 8454591.
- 904 102. Mittal M, Tiruppathi C, Nepal S, Zhao YY, Grzych D, Soni D, et al. TNFalpha-stimulated gene-6  
905 (TSG6) activates macrophage phenotype transition to prevent inflammatory lung injury. *Proc Natl Acad  
906 Sci U S A*. 2016;113(50):E8151-E8. Epub 20161128. doi: 10.1073/pnas.1614935113. PubMed PMID:  
907 27911817; PubMed Central PMCID: PMC5167170.
- 908 103. Nauta AJ, Bottazzi B, Mantovani A, Salvatori G, Kishore U, Schwaeble WJ, et al. Biochemical  
909 and functional characterization of the interaction between pentraxin 3 and C1q. *European Journal of  
910 Immunology*. 2003;33(2):465-73. doi: 10.1002/immu.200310022.
- 911 104. Garlanda C, Bottazzi B, Bastone A, Mantovani A. Pentraxins at the crossroads between innate  
912 immunity, inflammation, matrix deposition, and female fertility. *Annu Rev Immunol*. 2005;23:337-66. doi:  
913 10.1146/annurev.immunol.23.021704.115756. PubMed PMID: 15771574.
- 914 105. Takai C, Matsumoto I, Inoue A, Umeda N, Tanaka Y, Kurashima Y, et al. Specific overexpression  
915 of tumour necrosis factor- $\alpha$ -induced protein (TNFAIP)9 in CD14+CD16- monocytes in patients with  
916 rheumatoid arthritis: comparative analysis with TNFAIP3. *Clinical and Experimental Immunology*.  
917 2015;180(3):458-66. doi: 10.1111/cei.12606.
- 918 106. Inoue A, Matsumoto I, Tanaka Y, Umeda N, Tanaka Y, Mihara M, et al. Murine tumor necrosis  
919 factor  $\alpha$ -induced adipose-related protein (tumor necrosis factor  $\alpha$ -induced protein 9) deficiency leads to  
920 arthritis via interleukin-6 overproduction with enhanced NF- $\kappa$ B, STAT-3 signaling, and dysregulated  
921 apoptosis of macrophages. *Arthritis & Rheumatism*. 2012;64(12):3877-85. doi: 10.1002/art.34666.

- 922 107. Groves D, Jiang Y. Chemokines, a family of chemotactic cytokines. *Critical Reviews in Oral*  
923 *Biology & Medicine*. 1995;6(2):109-18.
- 924 108. Foley JF, Yu C-R, Solow R, Yacobucci M, Peden KWC, Farber JM. Roles for CXC Chemokine  
925 Ligands 10 and 11 in Recruiting CD4+T Cells to HIV-1-Infected Monocyte-Derived Macrophages,  
926 Dendritic Cells, and Lymph Nodes. *The Journal of Immunology*. 2005;174(8):4892-900. doi:  
927 10.4049/jimmunol.174.8.4892.
- 928 109. Smith DF, Galkina E, Ley K, Huo Y. GRO family chemokines are specialized for monocyte arrest  
929 from flow. *Am J Physiol Heart Circ Physiol*. 2005;289(5):H1976-84. Epub 20050603. doi:  
930 10.1152/ajpheart.00153.2005. PubMed PMID: 15937099.
- 931 110. Ahuja SK, Murphy PM. The CXC Chemokines Growth-regulated Oncogene (GRO)  $\alpha$ , GRO $\beta$ ,  
932 GRO $\gamma$ , Neutrophil-activating Peptide-2, and Epithelial Cell-derived Neutrophil-activating Peptide-78 Are  
933 Potent Agonists for the Type B, but Not the Type A, Human Interleukin-8 Receptor. *Journal of Biological*  
934 *Chemistry*. 1996;271(34):20545-50. doi: 10.1074/jbc.271.34.20545.
- 935 111. Ahuja SK, Murphy PM. The CXC chemokines growth-regulated oncogene (GRO)  $\alpha$ ,  
936 GRO $\beta$ , GRO $\gamma$ , neutrophil-activating peptide-2, and epithelial cell-derived neutrophil-activating  
937 peptide-78 are potent agonists for the type B, but not the type A, human interleukin-8 receptor. *J Biol*  
938 *Chem*. 1996;271(34):20545-50. doi: 10.1074/jbc.271.34.20545. PubMed PMID: 8702798.
- 939 112. Rudack C, Maune S, Eble J, Schroeder J-M. The Primary Role in Biologic Activity of the  
940 Neutrophil Chemokines IL-8 and GRO- $\alpha$  in Cultured Nasal Epithelial Cells. *Journal of Interferon &*  
941 *Cytokine Research*. 2003;23(2):113-23. doi: 10.1089/107999003321455507.
- 942 113. Metzemaekers M, Gouwy M, Proost P. Neutrophil chemoattractant receptors in health and  
943 disease: double-edged swords. *Cellular & Molecular Immunology*. 2020;17(5):433-50. doi:  
944 10.1038/s41423-020-0412-0.
- 945 114. Zaja-Milatovic S, Richmond A. CXC chemokines and their receptors: a case for a significant  
946 biological role in cutaneous wound healing. *Histol Histopathol*. 2008;23(11):1399-407. doi: 10.14670/HH-  
947 23.1399. PubMed PMID: 18785122; PubMed Central PMCID: PMC3140405.

- 948 115. Al-Alwan LA, Chang Y, Baglole CJ, Risse P-A, Halayko AJ, Martin JG, et al. Autocrine-regulated  
949 airway smooth muscle cell migration is dependent on IL-17–induced growth-related oncogenes. *Journal*  
950 *of Allergy and Clinical Immunology*. 2012;130(4):977-85.e6. doi: 10.1016/j.jaci.2012.04.042.
- 951 116. Chen C-L, Wang Y, Huang C-Y, Zhou Z-Q, Zhao J-J, Zhang X-F, et al. IL-17 induces antitumor  
952 immunity by promoting beneficial neutrophil recruitment and activation in esophageal squamous cell  
953 carcinoma. *Oncolimmunology*. 2017;7(1). doi: 10.1080/2162402x.2017.1373234.
- 954 117. Rotondi M, Chiovato L, Romagnani S, Serio M, Romagnani P. Role of chemokines in endocrine  
955 autoimmune diseases. *Endocr Rev*. 2007;28(5):492-520. Epub 20070502. doi: 10.1210/er.2006-0044.  
956 PubMed PMID: 17475924.
- 957 118. Smit MJ, Verdijk P, van der Raaij-Helmer EM, Navis M, Hensbergen PJ, Leurs R, et al. CXCR3-  
958 mediated chemotaxis of human T cells is regulated by a Gi- and phospholipase C-dependent pathway  
959 and not via activation of MEK/p44/p42 MAPK nor Akt/PI-3 kinase. *Blood*. 2003;102(6):1959-65. Epub  
960 20030515. doi: 10.1182/blood-2002-12-3945. PubMed PMID: 12750173.
- 961 119. Simmons RP, Scully EP, Groden EE, Arnold KB, Chang JJ, Lane K, et al. HIV-1 infection induces  
962 strong production of IP-10 through TLR7/9-dependent pathways. *AIDS*. 2013;27(16):2505-17. Epub  
963 2013/10/08. doi: 10.1097/01.aids.0000432455.06476.bc. PubMed PMID: 24096630; PubMed Central  
964 PMCID: PMC4288813.
- 965 120. Gray CM, Liovat A-S, Rey-Cuillé M-A, Lécuroux C, Jacquelin B, Girault I, et al. Acute Plasma  
966 Biomarkers of T Cell Activation Set-Point Levels and of Disease Progression in HIV-1 Infection. *PLoS*  
967 *ONE*. 2012;7(10). doi: 10.1371/journal.pone.0046143.
- 968 121. Valverde-Villegas JM, de Medeiros RM, Ellwanger JH, Santos BR, Melo MG, Almeida SEM, et al.  
969 High CXCL10/IP-10 levels are a hallmark in the clinical evolution of the HIV infection. *Infect Genet Evol*.  
970 2018;57:51-8. Epub 2017/11/11. doi: 10.1016/j.meegid.2017.11.002. PubMed PMID: 29122683.
- 971 122. Pastor L, Casellas A, Carrillo J, Alonso S, Parker E, Fuente-Soro L, et al. IP-10 Levels as an  
972 Accurate Screening Tool to Detect Acute HIV Infection in Resource-Limited Settings. *Sci Rep*.  
973 2017;7(1):8104. Epub 2017/08/16. doi: 10.1038/s41598-017-08218-0. PubMed PMID: 28808319;  
974 PubMed Central PMCID: PMC4556096.

- 975 123. Wang Z, Yin X, Ma M, Ge H, Lang B, Sun H, et al. IP-10 Promotes Latent HIV Infection in Resting  
976 Memory CD4(+) T Cells via LIMK-Cofilin Pathway. *Front Immunol.* 2021;12:656663. Epub 2021/08/28.  
977 doi: 10.3389/fimmu.2021.656663. PubMed PMID: 34447368; PubMed Central PMCID:  
978 PMCPMC8383741.
- 979 124. Cameron PU, Saleh S, Sallmann G, Solomon A, Wightman F, Evans VA, et al. Establishment of  
980 HIV-1 latency in resting CD4+ T cells depends on chemokine-induced changes in the actin cytoskeleton.  
981 *Proc Natl Acad Sci U S A.* 2010;107(39):16934-9. Epub 2010/09/15. doi: 10.1073/pnas.1002894107.  
982 PubMed PMID: 20837531; PubMed Central PMCID: PMCPMC2947912.
- 983 125. Ouyang W, O'Garra A. IL-10 Family Cytokines IL-10 and IL-22: from Basic Science to Clinical  
984 Translation. *Immunity.* 2019;50(4):871-91. Epub 2019/04/18. doi: 10.1016/j.immuni.2019.03.020. PubMed  
985 PMID: 30995504.
- 986 126. Saraiva M, O'Garra A. The regulation of IL-10 production by immune cells. *Nat Rev Immunol.*  
987 2010;10(3):170-81. Epub 2010/02/16. doi: 10.1038/nri2711. PubMed PMID: 20154735.
- 988 127. Werling D, Jungi TW. TOLL-like receptors linking innate and adaptive immune response.  
989 *Veterinary Immunology and Immunopathology.* 2003;91(1):1-12. doi: 10.1016/s0165-2427(02)00228-3.
- 990 128. Diebold SS, Kaisho T, Hemmi H, Akira S, Reis e Sousa C. Innate antiviral responses by means of  
991 TLR7-mediated recognition of single-stranded RNA. *Science.* 2004;303(5663):1529-31. Epub 20040219.  
992 doi: 10.1126/science.1093616. PubMed PMID: 14976261.
- 993 129. Heil F, Hemmi H, Hochrein H, Ampenberger F, Kirschning C, Akira S, et al. Species-specific  
994 recognition of single-stranded RNA via toll-like receptor 7 and 8. *Science.* 2004;303(5663):1526-9. Epub  
995 2004/02/21. doi: 10.1126/science.1093620. PubMed PMID: 14976262.
- 996 130. Borducchi EN, Liu J, Nkolola JP, Cadena AM, Yu W-H, Fischinger S, et al. Antibody and TLR7  
997 agonist delay viral rebound in SHIV-infected monkeys. *Nature.* 2018;563(7731):360-4. doi:  
998 10.1038/s41586-018-0600-6.
- 999 131. Lim S-Y, Osuna CE, Hrabec PT, Hesselgesser J, Gerold JM, Barnes TL, et al. TLR7 agonists  
1000 induce transient viremia and reduce the viral reservoir in SIV-infected rhesus macaques on antiretroviral  
1001 therapy. *Science Translational Medicine.* 2018;10(439). doi: 10.1126/scitranslmed.aao4521.

- 1002 132. SenGupta D, Brinson C, DeJesus E, Mills A, Shalit P, Guo S, et al. The TLR7 agonist  
1003 vesatolimod induced a modest delay in viral rebound in HIV controllers after cessation of antiretroviral  
1004 therapy. *Sci Transl Med.* 2021;13(599). Epub 2021/06/25. doi: 10.1126/scitranslmed.abg3071. PubMed  
1005 PMID: 34162752.
- 1006 133. Azar P, Mejia JE, Cenac C, Shaiykova A, Youness A, Laffont S, et al. TLR7 dosage  
1007 polymorphism shapes interferogenesis and HIV-1 acute viremia in women. *JCI Insight.* 2020;5(12). Epub  
1008 2020/06/20. doi: 10.1172/jci.insight.136047. PubMed PMID: 32554924; PubMed Central PMCID:  
1009 PMCPMC7406249.
- 1010 134. Abbas F, Cenac C, Youness A, Azar P, Delobel P, Guery JC. HIV-1 infection enhances innate  
1011 function and *TLR7* expression in female plasmacytoid dendritic cells. *Life Sci Alliance.* 2022;5(10).  
1012 Epub 2022/10/23. doi: 10.26508/lsa.202201452. PubMed PMID: 36271499; PubMed Central PMCID:  
1013 PMCPMC9441429.
- 1014 135. Klatt NR, Funderburg NT, Brenchley JM. Microbial translocation, immune activation, and HIV  
1015 disease. *Trends Microbiol.* 2013;21(1):6-13. Epub 2012/10/11. doi: 10.1016/j.tim.2012.09.001. PubMed  
1016 PMID: 23062765; PubMed Central PMCID: PMCPMC3534808.
- 1017 136. Younas M, Psomas C, Reynes C, Cezar R, Kundura L, Portales P, et al. Microbial Translocation  
1018 Is Linked to a Specific Immune Activation Profile in HIV-1-Infected Adults With Suppressed Viremia. *Front*  
1019 *Immunol.* 2019;10:2185. Epub 2019/09/13. doi: 10.3389/fimmu.2019.02185. PubMed PMID: 31572392;  
1020 PubMed Central PMCID: PMCPMC6753629.
- 1021 137. Nganou-Makamdop K, Talla A, Sharma AA, Darko S, Ransier A, Laboune F, et al. Translocated  
1022 microbiome composition determines immunological outcome in treated HIV infection. *Cell.*  
1023 2021;184(15):3899-914 e16. Epub 2021/07/07. doi: 10.1016/j.cell.2021.05.023. PubMed PMID: 34237254;  
1024 PubMed Central PMCID: PMCPMC8316372.
- 1025 138. Massanella M, Fromentin R, Chomont N. Residual inflammation and viral reservoirs: alliance  
1026 against an HIV cure. *Curr Opin HIV AIDS.* 2016;11(2):234-41. doi: 10.1097/COH.0000000000000230.  
1027 PubMed PMID: 26575148; PubMed Central PMCID: PMCPMC4743501.



- 1028 139. Zilberman-Schapira G, Zmora N, Itav S, Bashiardes S, Elinav H, Elinav E. The gut microbiome in  
1029 human immunodeficiency virus infection. *BMC Med.* 2016;14(1):83. Epub 2016/06/04. doi:  
1030 10.1186/s12916-016-0625-3. PubMed PMID: 27256449; PubMed Central PMCID: PMC4891875.
- 1031 140. Zevin AS, McKinnon L, Burgener A, Klatt NR. Microbial translocation and microbiome dysbiosis in  
1032 HIV-associated immune activation. *Curr Opin HIV AIDS.* 2016;11(2):182-90. Epub 2015/12/19. doi:  
1033 10.1097/COH.0000000000000234. PubMed PMID: 26679414; PubMed Central PMCID:  
1034 PMCPMC4752849.
- 1035 141. Penny CJ, Vassileva K, Jha A, Yuan Y, Chee X, Yates E, et al. Mining of Ebola virus entry  
1036 inhibitors identifies approved drugs as two-pore channel pore blockers. *Biochim Biophys Acta Mol Cell*  
1037 *Res.* 2019;1866(7):1151-61. Epub 20181105. doi: 10.1016/j.bbamcr.2018.10.022. PubMed PMID:  
1038 30408544; PubMed Central PMCID: PMCPMC7114365.
- 1039 142. Dobson SJ, Mankouri J, Whitehouse A. Identification of potassium and calcium channel inhibitors  
1040 as modulators of polyomavirus endosomal trafficking. *Antiviral Res.* 2020;179:104819. Epub 20200508.  
1041 doi: 10.1016/j.antiviral.2020.104819. PubMed PMID: 32389733; PubMed Central PMCID:  
1042 PMCPMC7205714.
- 1043 143. Choi B, Gatti PJ, Haislip AM, Fermin CD, Garry RF. Role of potassium in human  
1044 immunodeficiency virus production and cytopathic effects. *Virology.* 1998;247(2):189-99.
- 1045 144. Choi B, Fermin CD, Comardelle AM, Haislip AM, Voss TG, Garry RF. Alterations in intracellular  
1046 potassium concentration by HIV-1 and SIV Nef. *Virology.* 2008;5:60. Epub 20080519. doi: 10.1186/1743-  
1047 422X-5-60. PubMed PMID: 18489774; PubMed Central PMCID: PMCPMC2396157.
- 1048 145. Wu M, Wang H, Yu H, Makhina E, Xu J, Dawson ES, et al. A potent and selective small molecule  
1049 Kir2.1 inhibitor. *Probe Reports from the NIH Molecular Libraries Program.* Bethesda (MD)2010.
- 1050 146. Regoes RR, Rosenbloom DIS, Bacchetti P, Stone M, Deng X, Bosch RJ, et al. Assessing intra-  
1051 lab precision and inter-lab repeatability of outgrowth assays of HIV-1 latent reservoir size. *PLOS*  
1052 *Computational Biology.* 2019;15(4). doi: 10.1371/journal.pcbi.1006849.
- 1053 147. Stone M, Rosenbloom DIS, Bacchetti P, Deng X, Dimapasoc M, Keating S, et al. Assessing the  
1054 Suitability of Next-Generation Viral Outgrowth Assays to Measure Human Immunodeficiency Virus 1

- 1055 Latent Reservoir Size. *J Infect Dis.* 2021;224(7):1209-18. doi: 10.1093/infdis/jiaa089. PubMed PMID:  
1056 32147687; PubMed Central PMCID: PMC8514180.
- 1057 148. Offersen R, Yu W-H, Scully EP, Julg B, Euler Z, Sadanand S, et al. HIV Antibody Fc N-Linked  
1058 Glycosylation Is Associated with Viral Rebound. *Cell Reports.* 2020;33(11). doi:  
1059 10.1016/j.celrep.2020.108502.
- 1060 149. Ma T, McGregor M, Giron L, Xie G, George AF, Abdel-Mohsen M, et al. Single-cell glycomics  
1061 analysis by CyTOF-Lec reveals glycan features defining cells differentially susceptible to HIV. *eLife.*  
1062 2022;11. doi: 10.7554/eLife.78870.
- 1063 150. Giron LB, Palmer CS, Liu Q, Yin X, Pappasavvas E, Sharaf R, et al. Non-invasive plasma glycomic  
1064 and metabolic biomarkers of post-treatment control of HIV. *Nature Communications.* 2021;12(1). doi:  
1065 10.1038/s41467-021-24077-w.
- 1066 151. Frank SL, Klisak I, Sparkes RS, Lusic AJ. A gene homologous to plasminogen located on human  
1067 chromosome 2q11-p11. *Genomics.* 1989;4(3):449-51. doi: 10.1016/0888-7543(89)90356-x. PubMed  
1068 PMID: 2714803.
- 1069 152. Morioka H, Morii T, Vogel T, Hornicek FJ, Weissbach L. Interaction of plasminogen-related  
1070 protein B with endothelial and smooth muscle cells in vitro. *Exp Cell Res.* 2003;287(1):166-77. doi:  
1071 10.1016/s0014-4827(03)00137-x. PubMed PMID: 12799192.
- 1072 153. Ichinose A, Espling ES, Takamatsu J, Saito H, Shinmyozu K, Maruyama I, et al. Two types of  
1073 abnormal genes for plasminogen in families with a predisposition for thrombosis. *Proc Natl Acad Sci U S*  
1074 *A.* 1991;88(1):115-9. doi: 10.1073/pnas.88.1.115. PubMed PMID: 1986355; PubMed Central PMCID:  
1075 PMC50760.
- 1076 154. Ma J, Wei K, Liu J, Tang K, Zhang H, Zhu L, et al. Glycogen metabolism regulates macrophage-  
1077 mediated acute inflammatory responses. *Nature Communications.* 2020;11(1). doi: 10.1038/s41467-020-  
1078 15636-8.
- 1079 155. Maldarelli F, Wu X, Su L, Simonetti FR, Shao W, Hill S, et al. HIV latency. Specific HIV integration  
1080 sites are linked to clonal expansion and persistence of infected cells. *Science.* 2014;345(6193):179-83.  
1081 Epub 20140626. doi: 10.1126/science.1254194. PubMed PMID: 24968937; PubMed Central PMCID:  
1082 PMC4262401.

- 1083 156. Peluso MJ, Bacchetti P, Ritter KD, Beg S, Lai J, Martin JN, et al. Differential decay of intact and  
1084 defective proviral DNA in HIV-1-infected individuals on suppressive antiretroviral therapy. *JCI Insight*.  
1085 2020;5(4). Epub 2020/02/12. doi: 10.1172/jci.insight.132997. PubMed PMID: 32045386; PubMed Central  
1086 PMCID: PMC7101154.
- 1087 157. Falcinelli SD, Kilpatrick KW, Read J, Murtagh R, Allard B, Ghofrani S, et al. Longitudinal  
1088 Dynamics of Intact HIV Proviral DNA and Outgrowth Virus Frequencies in a Cohort of Individuals  
1089 Receiving Antiretroviral Therapy. *J Infect Dis*. 2021;224(1):92-100. Epub 2020/11/21. doi:  
1090 10.1093/infdis/jiaa718. PubMed PMID: 33216132; PubMed Central PMCID: PMC8253129.
- 1091 158. Gogarten SM, Sofer T, Chen H, Yu C, Brody JA, Thornton TA, et al. Genetic association testing  
1092 using the GENESIS R/Bioconductor package. *Bioinformatics*. 2019;35(24):5346-8. Epub 2019/07/23. doi:  
1093 10.1093/bioinformatics/btz567. PubMed PMID: 31329242; PubMed Central PMCID: PMC7904076.
- 1094 159. Stegle O, Parts L, Piipari M, Winn J, Durbin R. Using probabilistic estimation of expression  
1095 residuals (PEER) to obtain increased power and interpretability of gene expression analyses. *Nature*  
1096 *protocols*. 2012;7(3):500.
- 1097 160. Pantaleo G, Graziosi C, Butini L, Pizzo PA, Schnittman SM, Kotler DP, et al. Lymphoid organs  
1098 function as major reservoirs for human immunodeficiency virus. *Proc Natl Acad Sci U S A*.  
1099 1991;88(21):9838-42. Epub 1991/11/01. doi: 10.1073/pnas.88.21.9838. PubMed PMID: 1682922;  
1100 PubMed Central PMCID: PMC52816.
- 1101 161. Evering TH, Mehandru S, Racz P, Tenner-Racz K, Poles MA, Figueroa A, et al. Absence of HIV-1  
1102 evolution in the gut-associated lymphoid tissue from patients on combination antiviral therapy initiated  
1103 during primary infection. *PLoS Pathog*. 2012;8(2):e1002506. Epub 2012/02/10. doi:  
1104 10.1371/journal.ppat.1002506. PubMed PMID: 22319447; PubMed Central PMCID: PMC3271083.
- 1105 162. Josefsson L, von Stockenstrom S, Faria NR, Sinclair E, Bacchetti P, Killian M, et al. The HIV-1  
1106 reservoir in eight patients on long-term suppressive antiretroviral therapy is stable with few genetic  
1107 changes over time. *Proc Natl Acad Sci U S A*. 2013;110(51):E4987-96. Epub 2013/11/28. doi:  
1108 10.1073/pnas.1308313110. PubMed PMID: 24277811; PubMed Central PMCID: PMC3870728.
- 1109 163. Imamichi H, Degray G, Dewar RL, Mannon P, Yao M, Chairez C, et al. Lack of  
1110 compartmentalization of HIV-1 quasispecies between the gut and peripheral blood compartments. *J Infect*

- 1111 Dis. 2011;204(2):309-14. Epub 2011/06/16. doi: 10.1093/infdis/jir259. PubMed PMID: 21673043; PubMed  
1112 Central PMCID: PMCPMC3114472.
- 1113 164. Ramirez CM, Sinclair E, Epling L, Lee SA, Jain V, Hsue PY, et al. Immunologic profiles  
1114 distinguish aviremic HIV-infected adults. AIDS. 2016;30(10):1553-62. Epub 2016/02/09. doi:  
1115 10.1097/QAD.0000000000001049. PubMed PMID: 26854811; PubMed Central PMCID:  
1116 PMCPMC5679214.
- 1117 165. Boufassa F, Lechenadec J, Meyer L, Costagliola D, Hunt PW, Pereyra F, et al. Blunted response  
1118 to combination antiretroviral therapy in HIV elite controllers: an international HIV controller collaboration.  
1119 PLoS One. 2014;9(1):e85516. Epub 2014/01/28. doi: 10.1371/journal.pone.0085516. PubMed PMID:  
1120 24465584; PubMed Central PMCID: PMCPMC3894966.
- 1121 166. Emu B, Sinclair E, Hatano H, Ferre A, Shacklett B, Martin JN, et al. HLA class I-restricted T-cell  
1122 responses may contribute to the control of human immunodeficiency virus infection, but such responses  
1123 are not always necessary for long-term virus control. J Virol. 2008;82(11):5398-407. Epub 2008/03/21.  
1124 doi: 10.1128/JVI.02176-07. PubMed PMID: 18353945; PubMed Central PMCID: PMCPMC2395228.
- 1125 167. Grebe E, Facente SN, Bingham J, Pilcher CD, Powrie A, Gerber J, et al. Interpreting HIV  
1126 diagnostic histories into infection time estimates: analytical framework and online tool. BMC Infect Dis.  
1127 2019;19(1):894. Epub 2019/10/28. doi: 10.1186/s12879-019-4543-9. PubMed PMID: 31655566; PubMed  
1128 Central PMCID: PMCPMC6815418.
- 1129 168. Andrews S. FastQC: a quality control tool for high throughput sequence data. 2010. 2017.
- 1130 169. Schneider VA, Graves-Lindsay T, Howe K, Bouk N, Chen H-C, Kitts PA, et al. Evaluation of  
1131 GRCh38 and de novo haploid genome assemblies demonstrates the enduring quality of the reference  
1132 assembly. Genome Research. 2017;27(5):849-64. doi: 10.1101/gr.213611.116.
- 1133 170. Harrow J, Frankish A, Gonzalez JM, Tapanari E, Diekhans M, Kokocinski F, et al. GENCODE:  
1134 the reference human genome annotation for The ENCODE Project. Genome research. 2012;22(9):1760-  
1135 74.
- 1136 171. Dobin A, Gingeras TR. Mapping RNA-seq reads with STAR. Current protocols in bioinformatics.  
1137 2015;51(1):11.4. 1-.4. 9.

- 1138 172. Li B, Dewey CN. RSEM: accurate transcript quantification from RNA-Seq data with or without a  
1139 reference genome. *BMC bioinformatics*. 2011;12(1):1-16.
- 1140 173. Dobin A, Davis CA, Schlesinger F, Drenkow J, Zaleski C, Jha S, et al. STAR: ultrafast universal  
1141 RNA-seq aligner. *Bioinformatics*. 2013;29(1):15-21.
- 1142 174. Robinson MD, Oshlack A. A scaling normalization method for differential expression analysis of  
1143 RNA-seq data. *Genome biology*. 2010;11(3):1-9.
- 1144 175. Law CW, Chen Y, Shi W, Smyth GK. voom: Precision weights unlock linear model analysis tools  
1145 for RNA-seq read counts. *Genome biology*. 2014;15(2):1-17.
- 1146 176. Ritchie ME, Phipson B, Wu D, Hu Y, Law CW, Shi W, et al. limma powers differential expression  
1147 analyses for RNA-sequencing and microarray studies. *Nucleic acids research*. 2015;43(7):e47-e.
- 1148 177. Devlin B, Roeder K. Genomic control for association studies. *Biometrics*. 1999;55(4):997-1004.
- 1149 178. Yu G, Wang L-G, Han Y, He Q-Y. clusterProfiler: an R package for comparing biological themes  
1150 among gene clusters. *Omics: a journal of integrative biology*. 2012;16(5):284-7.
- 1151

**Table 1.** Descriptive statistics for the study population of 191 HIV-infected ART-suppressed non-controllers. Median frequencies (with interquartile ranges) are shown below unless otherwise specified.

| <b>Descriptive Characteristic</b>                                         | <b>Total<br/>(N=191)</b> | <b>Early-Treated<sup>a</sup><br/>(N=54)</b> | <b>Later-Treated<sup>a</sup><br/>(N=137)</b> |
|---------------------------------------------------------------------------|--------------------------|---------------------------------------------|----------------------------------------------|
| Male (%) <sup>b</sup>                                                     | 183 (96%)                | 54 (100%)                                   | 129 (94%)                                    |
| Age (years)                                                               | 47 (13)                  | 44 (12)                                     | 47 (13)                                      |
| Nadir CD4+ T cell count (cells/mm <sup>3</sup> )                          | 352 (251)                | 522 (346)                                   | 304 (190)                                    |
| Maximum pre-ART HIV RNA (log <sub>10</sub> copies/mL)                     | 5.1 (0.9)                | 5.6 (0.7)                                   | 5.0 (0.8)                                    |
| Duration of ART suppression (years)                                       | 5.1 (4.2)                | 6.0 (4.3)                                   | 4.7 (4.2)                                    |
| Timing of ART initiation (years)                                          | 2.0 (4.6)                | 0.20 (0.19)                                 | 3.5 (4.3)                                    |
| HIV intact DNA (log <sub>10</sub> copies/10 <sup>6</sup> CD4+ T cells)    | 1.3 (1.0)                | 1.3 (0.5)                                   | 1.9 (1.0)                                    |
| HIV total DNA (log <sub>10</sub> copies/10 <sup>6</sup> CD4+ T cells)     | 1.0 (1.3)                | 0.4 (1.3)                                   | 1.2 (1.3)                                    |
| HIV unspliced RNA (log <sub>10</sub> copies/10 <sup>6</sup> CD4+ T cells) | 3.2 (0.8)                | 3.0 (0.8)                                   | 3.3 (0.7)                                    |
| HIV RNA/DNA                                                               | 2.3 (1.0)                | 2.4 (1.0)                                   | 2.3 (0.9)                                    |

<sup>a</sup> Early-treated = Individuals who initiated ART within 6 months of the date of detected HIV infection; later-treated = Individuals who initiated ART after 6 months of date of detected HIV infection.

<sup>b</sup> Absolute frequencies (with percent)

**Figure 1.** Principal component analysis (PCA) plot of the population structure. Principal component analysis (PCA) plot of the population structure of the full study cohort (a). Secondary PCA plot of the European ancestry subpopulation only (b) defined by the dashed box in the lower left of panel (a). Genetic PCs were calculated from genetic data from our whole exome analysis [25]. Most of the population was of European ancestry (bottom left of (a) some continued variability. Some continued variability was observed in European ancestry subgroup (b). Self-identified race/ethnicity shown in the legend. Frequencies for participants were recorded as: White/European American (62%), Black/African American (14%), Hispanic/Latino (11%), Mixed Ethnicity/Multiracial (6%), Asian (4%), Pacific Islander (2%), Native American (<1%), and Middle Eastern (<1%).

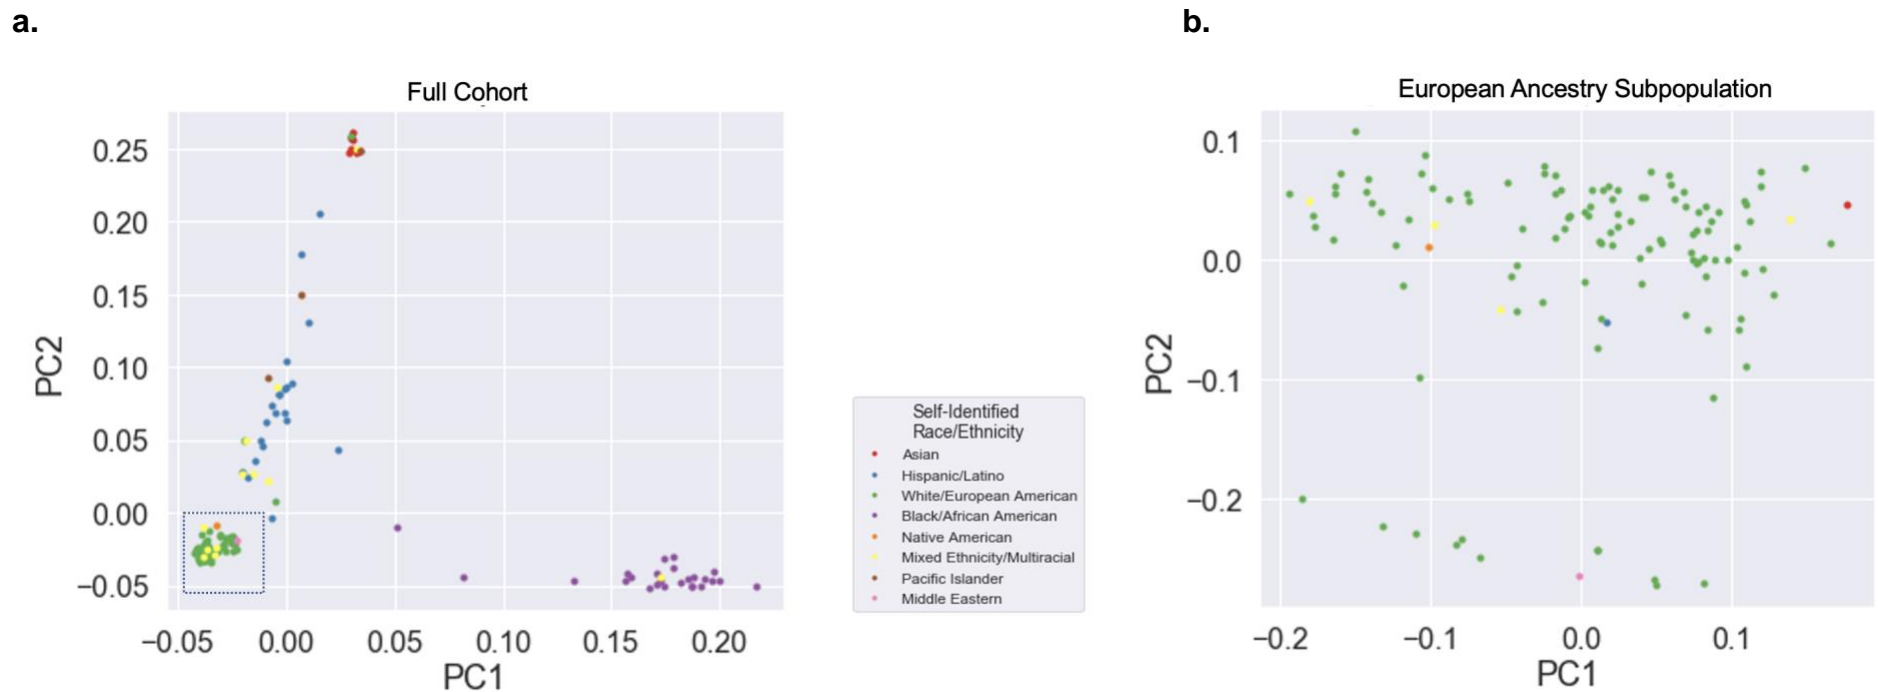

**Figure 2.** Correlations between three measures of HIV reservoir size. HIV unspliced RNA (usRNA) was significantly correlated with (a) HIV Total DNA (tDNA) and (b) HIV intact DNA; (c) tDNA and intact DNA were not correlated with one another.

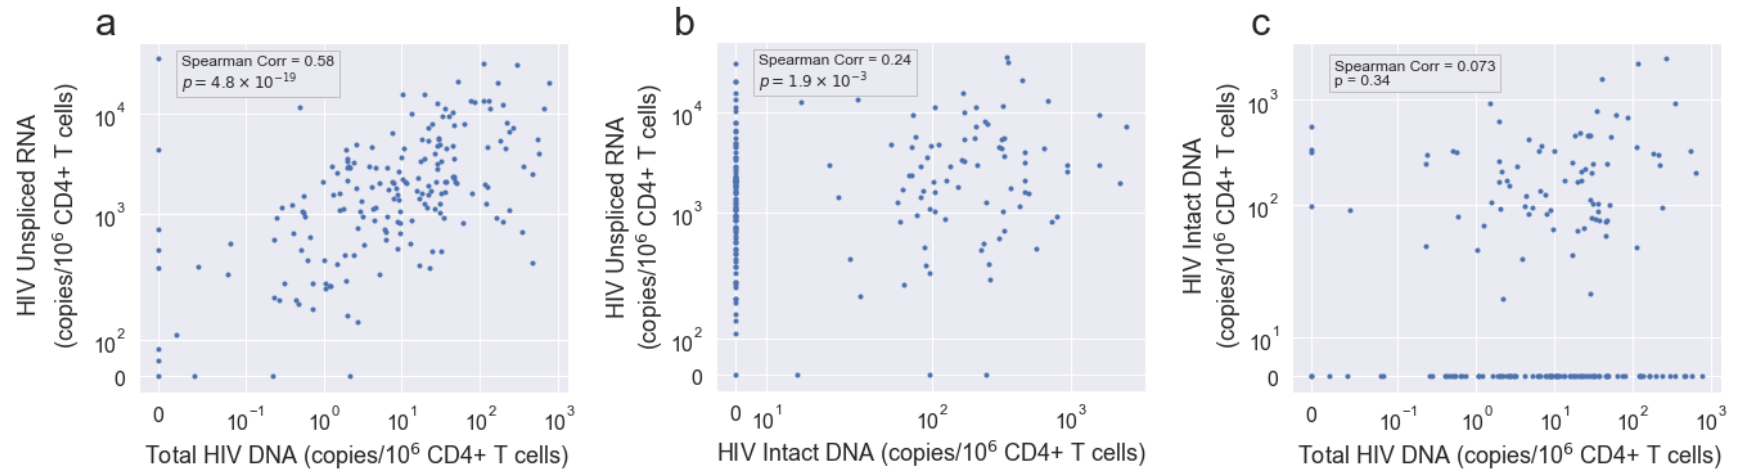



**Figure 3.** Measures of the HIV reservoir from peripheral CD4+ T cells were associated with timing of ART initiation. Panels A-D correspond to HIV tDNA, HIV usRNA, RNA/DNA, and Intact DNA, respectively. Spearman correlation and corresponding p-value are shown in each case. Earlier timing of ART initiation (<6 months from infection) was statistically significantly associated with smaller HIV intact DNA, tDNA, and usRNA.

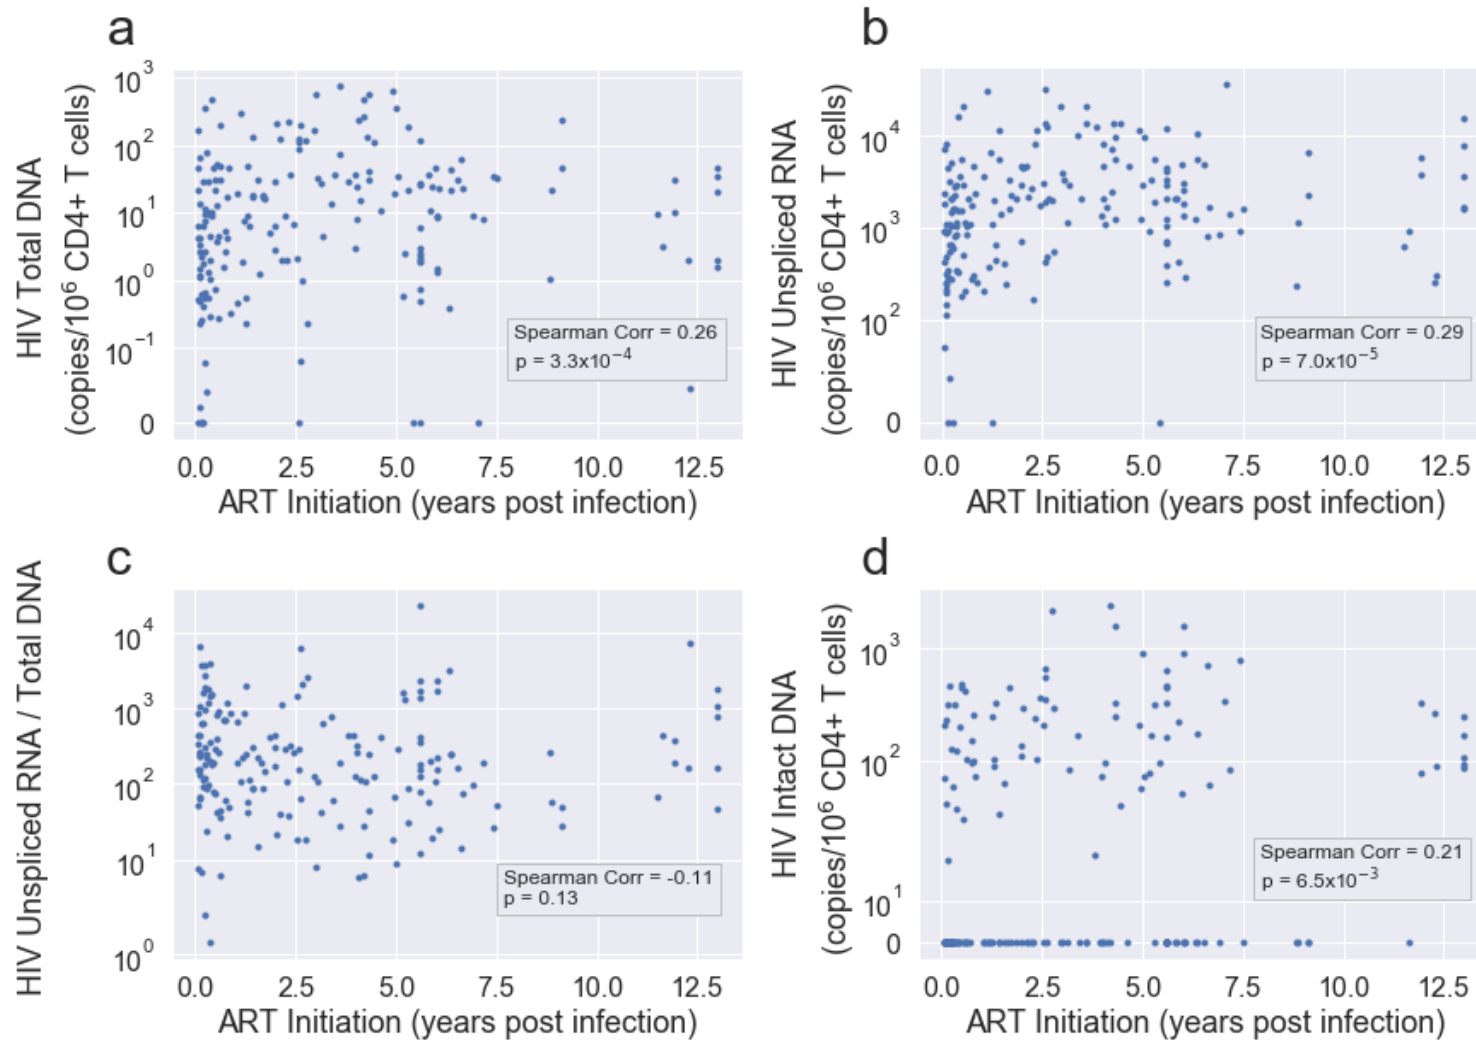

**Table 2.** Differentially expressed host genes in relation to log<sub>10</sub>copies of HIV unspliced RNA (usRNA) in the full cohort (top panel) and the European ancestry subpopulation (bottom panel), at a Benjamini-Hochberg false discovery rate (FDR) of q<0.05. HIV usRNA was significantly associated with downregulation of 17 host genes, including *KCNJ2*, a novel association with a gene encoding for an inwardly rectifying potassium (Kir2.1) channel (which may enhance HIV entry and release into host cells [32]), gap junction (*GJB2*) as well as genes involved in pathogen pattern recognition (*TLR7*), inflammasome cytokine activation (*IL1A*, *CSF3*, *TNFAIP5*, *TNFAIP9*, *TNFAIP9*), and chemokine production (*CXCL3*, *CXCL10*). An additional list of host genes associated with HIV usRNA at an FDR q<0.25 is shown in **Supplemental Table 2**.

| HIV Unspliced RNA  |                                                                    |                |                |                 |                       |                                                                                                                                                                                                                                                                                                                                                                                                                                                                                                       |
|--------------------|--------------------------------------------------------------------|----------------|----------------|-----------------|-----------------------|-------------------------------------------------------------------------------------------------------------------------------------------------------------------------------------------------------------------------------------------------------------------------------------------------------------------------------------------------------------------------------------------------------------------------------------------------------------------------------------------------------|
| Gene               | Gene Name                                                          | p <sup>a</sup> | q <sup>b</sup> | FC <sup>c</sup> | % Change <sup>d</sup> | Description                                                                                                                                                                                                                                                                                                                                                                                                                                                                                           |
| <b>Full Cohort</b> |                                                                    |                |                |                 |                       |                                                                                                                                                                                                                                                                                                                                                                                                                                                                                                       |
| <i>KCNJ2</i>       | Potassium Inwardly Rectifying Channel Subfamily J Member 2, kir2.1 | 1.49E-07       | 0.003          | 0.903           | -9.7                  | <i>KCNJ2</i> , encodes for an inwardly rectifying potassium channel (Kir2.1). Inwardly rectifying potassium ion channels can regulate HIV 1 entry and release into host cells [32]. Tight regulation of potassium ion concentrations has been shown to play a critical role in HIV-1 virus production in CD4+ T cells in cell culture models [143].                                                                                                                                                   |
| <i>IL1A</i>        | Interleukin-1 alpha                                                | 1.55E-06       | 0.012          | 0.904           | -9.6                  | <i>IL-1</i> is a potent proinflammatory cytokine that regulates inflammation by triggering a cascade of inflammatory mediators via NLRP3 inflammasome activation pathway [81, 82]. <i>IL-1</i> is an “upstream” pro-inflammatory inducer of interleukin-6 ( <i>IL-6</i> ) [83], which is the strongest biomarker for non-AIDS morbidity (e.g., myocardial infarction, stroke, malignancy) [84-87] and mortality [80, 86-89] among HIV-infected ART-suppressed individuals in resource-rich countries. |
| <i>GJB2</i>        | Gap Junction Protein Beta 2                                        | 2.26E-06       | 0.012          | 0.929           | -7.1                  | <i>GJB2</i> encodes for gap junction beta 2 protein, or connexin 26 ( <i>CX26</i> ), which acts as a communication channel between cells, facilitating transport of signaling molecules (calcium and cyclic AMP, ATP), and charged ions (K+, Ca+) [33, 34]. HIV-1 is thought to exploit these communication channels to disseminate infection and associated inflammation even in the absence of viral replication [46, 47].                                                                          |
| <i>KCNJ2-AS1</i>   | KCNJ2 antisense RNA 1                                              | 2.49E-06       | 0.012          | 0.916           | -8.4                  | <i>KCNJ2-AS1</i> is a long non-coding RNA (lncRNA) encodes for KCN2 antisense RNA 1.                                                                                                                                                                                                                                                                                                                                                                                                                  |
| <i>AC034199.1</i>  | <i>AC034199.1</i>                                                  | 2.88E-06       | 0.012          | 0.946           | -5.4                  | Novel transcript: no data found in literature in association with HIV or immune response.                                                                                                                                                                                                                                                                                                                                                                                                             |
| <i>CSF3</i>        | Colony Stimulating Factor 3 (G-CSF)                                | 3.93E-06       | 0.013          | 0.925           | -7.5                  | <i>CSF3</i> encodes for granulocyte stimulating factor 3 (G-CSF), a member of the IL-6 superfamily of cytokines (78) and is also a growth factor for Neutrophils [90]. CSF3 modulates the function of CD4+ T cells by regulating cytokine production, their differentiation, and Treg induction [91].                                                                                                                                                                                                 |
| <i>TNFAIP6</i>     | Tumor Necrosis Factor alpha induced protein 6                      | 5.99E-06       | 0.016          | 0.924           | -7.6                  | <i>TNFAIP6</i> encodes for TNF-stimulated gene 6 protein (TSG-6), which, like TNFAIP5 (TSG-5), is induced by tumor necrosis factor α (TNF-α) and interleukin-1 (IL-1) in response to lipopolysaccharide (LPS)-stimulation [101, 102].                                                                                                                                                                                                                                                                 |

|                      |                                                                                                                                  |          |       |       |      |                                                                                                                                                                                                                                                                                                                                                                                        |
|----------------------|----------------------------------------------------------------------------------------------------------------------------------|----------|-------|-------|------|----------------------------------------------------------------------------------------------------------------------------------------------------------------------------------------------------------------------------------------------------------------------------------------------------------------------------------------------------------------------------------------|
| <i>TLR7</i>          | Toll Like Receptor 7                                                                                                             | 6.59E-06 | 0.016 | 0.929 | -7.1 | <i>TLR7</i> is a member of toll-like receptor family of genes which plays critical role in pathogen recognition, activation of innate immune response and functions as a bridge between innate and adaptive immunity [127]. <i>TLR7</i> , is a pattern recognition receptor that can sense HIV single-stranded RNA (ssRNA) in endosomes [128, 129].                                    |
| <i>MRAS</i>          | Muscle RAS oncogene homolog                                                                                                      | 1.07E-05 | 0.024 | 0.945 | -5.5 | <i>MRAS</i> encodes for a protein in the Ras family of small GTPases which functions as signal transducers in cellular processes.                                                                                                                                                                                                                                                      |
| <i>TNFAIP9</i>       | Tumor Necrosis Factor alpha induced protein 9                                                                                    | 1.53E-05 | 0.031 | 0.931 | -6.9 | <i>TNFAIP9</i> , encodes for TNF- $\alpha$ induced protein 9 (TSG-9). It is also known as STEAP4 (six transmembrane epithelial antigen of prostate 4) involved in negative regulation of NF- $\kappa$ B, STAT-3 signaling, and IL-6 production [105, 106].                                                                                                                             |
| <i>MIR3945HG</i>     | MIR3945 Host Gene                                                                                                                | 2.09E-05 | 0.038 | 0.942 | -5.8 | <i>MIR3945HG</i> is an interferon stimulated lncRNA.                                                                                                                                                                                                                                                                                                                                   |
| <i>DAPK1-IT1</i>     | DAPK1 Intronic Transcript 1                                                                                                      | 2.72E-05 | 0.043 | 0.950 | -5.0 | <i>DAPK1-IT1</i> is a lncRNA transcribed from the death associated protein kinases 1 (DAPK1).                                                                                                                                                                                                                                                                                          |
| <i>OR2B11</i>        | Olfactory Receptor Family 2 Subfamily B Member 11                                                                                | 2.96E-05 | 0.043 | 0.939 | -6.1 | OR2B11 is a member of G-protein-coupled receptors (GPCR) responsible for the recognition and G protein-mediated transduction of odorant signals.                                                                                                                                                                                                                                       |
| <i>CXCL3</i>         | C-X-C Motif Chemokine Ligand 3                                                                                                   | 3.03E-05 | 0.043 | 0.928 | -7.2 | <i>CXCL3</i> is a member of CXC subfamily called cytokine-induced neutrophil chemoattractant (CINCs). <i>CXCL3</i> is involved in adhesion and migration of monocytes [109, 110], neutrophils chemoattraction [111-113], and angiogenesis [114].                                                                                                                                       |
| <i>TNFAIP5 /PTX3</i> | TNF Alpha-Induced Protein 5 (TNFAIP5), Pentraxin-related protein (PTX3), Tumor Necrosis Factor-Inducible Protein TSG-14 (TSG14). | 3.27E-05 | 0.043 | 0.941 | -5.9 | <i>TNFAIP5</i> is a pattern recognition receptor (PRRs) that is induced in response to TNF- $\alpha$ , TLR engagement and IL-1 $\beta$ signaling [96, 97].                                                                                                                                                                                                                             |
| <i>RRN3P4</i>        | RRN3 Pseudogene 4                                                                                                                | 3.97E-05 | 0.049 | 0.950 | -5.0 | Pseudogene                                                                                                                                                                                                                                                                                                                                                                             |
| <i>CXCL10</i>        | C-X-C Motif Chemokine Ligand 10                                                                                                  | 4.21E-05 | 0.049 | 0.908 | -9.2 | <i>CXCL10</i> encodes for IP-10 (interferon gamma-induced protein 10) (interferon gamma-induced protein 10) which recruits activated Th1 lymphocytes to sites of infection [117-119] and in HIV, signals through TLR7/9-dependent pathways [119], predicts HIV disease progression [120, 121], correlates with acute HIV seroconversion [122], and promotes of HIV latency [123, 124]. |

### European Ancestry Subpopulation

|                               |                                              |          |       |       |      |                                                                                                                                                                                                                                                                                                                                                                                                                                               |
|-------------------------------|----------------------------------------------|----------|-------|-------|------|-----------------------------------------------------------------------------------------------------------------------------------------------------------------------------------------------------------------------------------------------------------------------------------------------------------------------------------------------------------------------------------------------------------------------------------------------|
| <i>TLR7<sup>e</sup></i>       | Toll Like Receptor 7                         | 1.48E-06 | 0.018 | 0.906 | -9.4 | <i>TLR7</i> is a member of toll-like receptor family of genes which plays critical role in pathogen recognition, activation of innate immune response and functions as a bridge between innate and adaptive immunity [127]. <i>TLR7</i> , is a pattern recognition receptor that can sense HIV single-stranded RNA (ssRNA) in endosomes [128, 129].                                                                                           |
| <i>GJB2<sup>e</sup></i>       | Gap Junction Protein Beta 2                  | 2.70E-06 | 0.018 | 0.909 | -9.1 | <i>GJB2</i> encodes for gap junction beta 2 protein, or connexin 26 (CX26), which acts as a communication channel between cells, facilitating transport of signaling molecules (calcium and cyclic AMP, ATP), and charged ions (K <sup>+</sup> , Ca <sup>+</sup> ) [33, 34]. HIV-1 is thought to exploit these communication channels to disseminate infection and associated inflammation even in the absence of viral replication [46, 47]. |
| <i>AC034199.1<sup>e</sup></i> | Ac034199.1                                   | 3.09E-06 | 0.018 | 0.930 | -7.0 | novel transcript                                                                                                                                                                                                                                                                                                                                                                                                                              |
| <i>PPP1R17</i>                | Protein Phosphatase 1 Regulatory Subunit 17, | 4.20E-06 | 0.018 | 0.934 | -6.6 | PPP1R17 (Protein Phosphatase 1 Regulatory Subunit 17) is a substrate for cGMP-dependent protein kinase.                                                                                                                                                                                                                                                                                                                                       |

|                   |                                     |          |       |       |      |                                                                                                  |
|-------------------|-------------------------------------|----------|-------|-------|------|--------------------------------------------------------------------------------------------------|
| <i>IGSF6</i>      | Immunoglobulin Superfamily Member 6 | 4.73E-06 | 0.018 | 0.972 | -2.8 | Immunoglobulin superfamily member 6 (IGSF6) is also known as downregulated by activation (DORA). |
| <i>AL133163.2</i> | Al133163.2                          | 7.81E-06 | 0.025 | 0.945 | -5.5 | novel transcript                                                                                 |

<sup>a</sup> p = two sided p-value.

<sup>b</sup> q = two-sided false discovery rate (FDR) Benjamini-Hochberg q-value.

<sup>c</sup> FC = fold-change in host gene expression per two-fold change in copies of HIV from multivariate model adjusted for age, sex, nadir CD4+ T cell count, timing of ART initiation, ancestry (PCs), and residual variability (probabilistic estimation of expression residuals, PEERs).

<sup>d</sup> % Change = percent change in host gene expression per two-fold change in copies of HIV.

<sup>e</sup> % also significant in full cohort analysis.

**Figure 4.** Network analysis of the top differentially expressed genes (see **Table 2** and **Supplemental Table 2**) associated with HIV unspliced RNA demonstrated that the top significant genes mapped to immunologic pathways involving bacterial translocation (e.g., TLR4 signaling, activated by bacterial lipopolysaccharide, LPS) and pro-inflammatory responses (e.g., IL-1 $\beta$  signaling, NLRP3 inflammasome assembly, Th2 cell cytokine production). A Benjamini-Hochberg false discovery rate (FDR) of  $q < 0.05$  was used to generate nodes (circles) based on kappa scores  $\geq 0.4$ . The size of the nodes reflects the enrichment significance of the terms, and the different colors represent distinct functional groups.

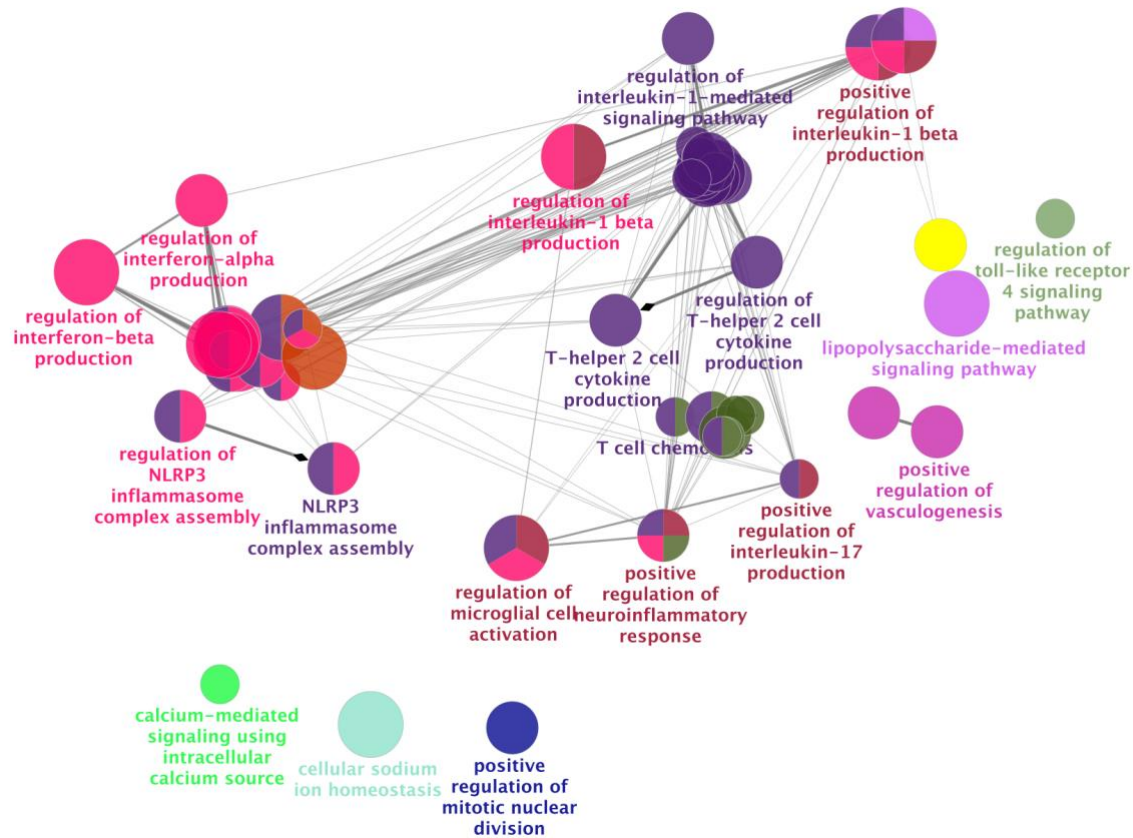

**Figure 5.** Network analysis of the top statistically significant gene sets associated with HIV unspliced RNA (see **Supplement Table 4**). Gene sets related to immunologic pathways involving bacterial translocation (e.g., response to bacterium, LPS-mediated signaling pathway), and inflammatory signaling (e.g., IL-1 $\beta$ , IL-6, IL-10, TNF- $\alpha$ ), were significantly associated with HIV usRNA. A Benjamini-Hochberg false discovery rate (FDR) of  $q < 0.05$  was used to generate nodes (circles) based on kappa scores  $\geq 0.4$ . The size of the nodes reflects the enrichment significance of the terms, and the different colors represent distinct functional groups.

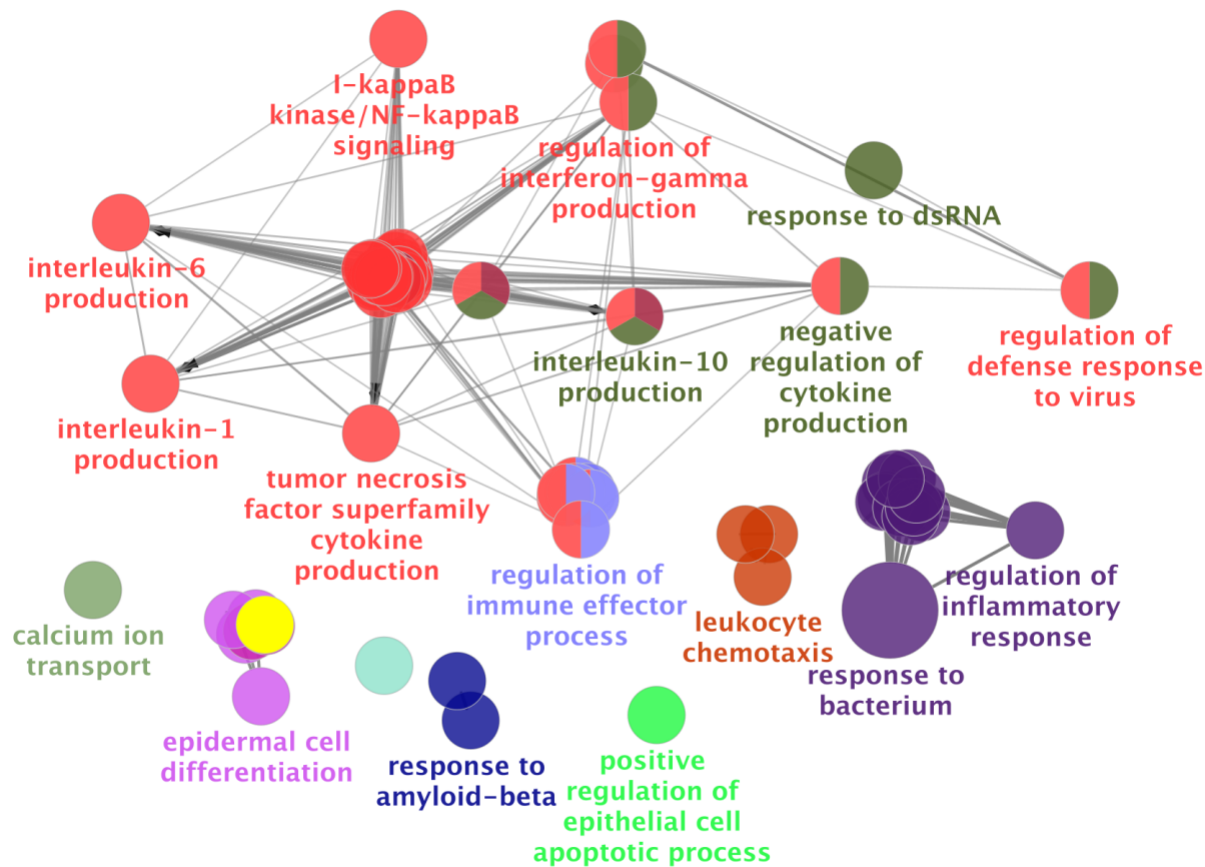

Source: https://www.biorxiv.org/content/10.1101/2023.01.10.523535v2.full.pdf
